# Supplementary material for: Stereoselective total synthesis of obolactones and 7′,8′-dihydroobolactones
Source: Royal Society of Chemistry journal article supplement (doi:10.1039/d1nj03990c), 2021-01-01

## Supporting Information

### **Stereoselective Total Synthesis of Obolactones and 7',8'-Dihydrobolactones**

Deepak Saini, Praveen Kumar and Rodney A. Fernandes\*  
Department of Chemistry, Indian Institute of Technology Bombay, Powai  
Mumbai 400076, Maharashtra, India

#### **Table of contents**

<sup>1</sup>H and <sup>13</sup>C spectra of all compounds

S2–S19

<sup>1</sup>H NMR (400 MHz, CDCl<sub>3</sub>) and <sup>13</sup>C{<sup>1</sup>H} NMR (100 MHz, CDCl<sub>3</sub>) of Compound 10

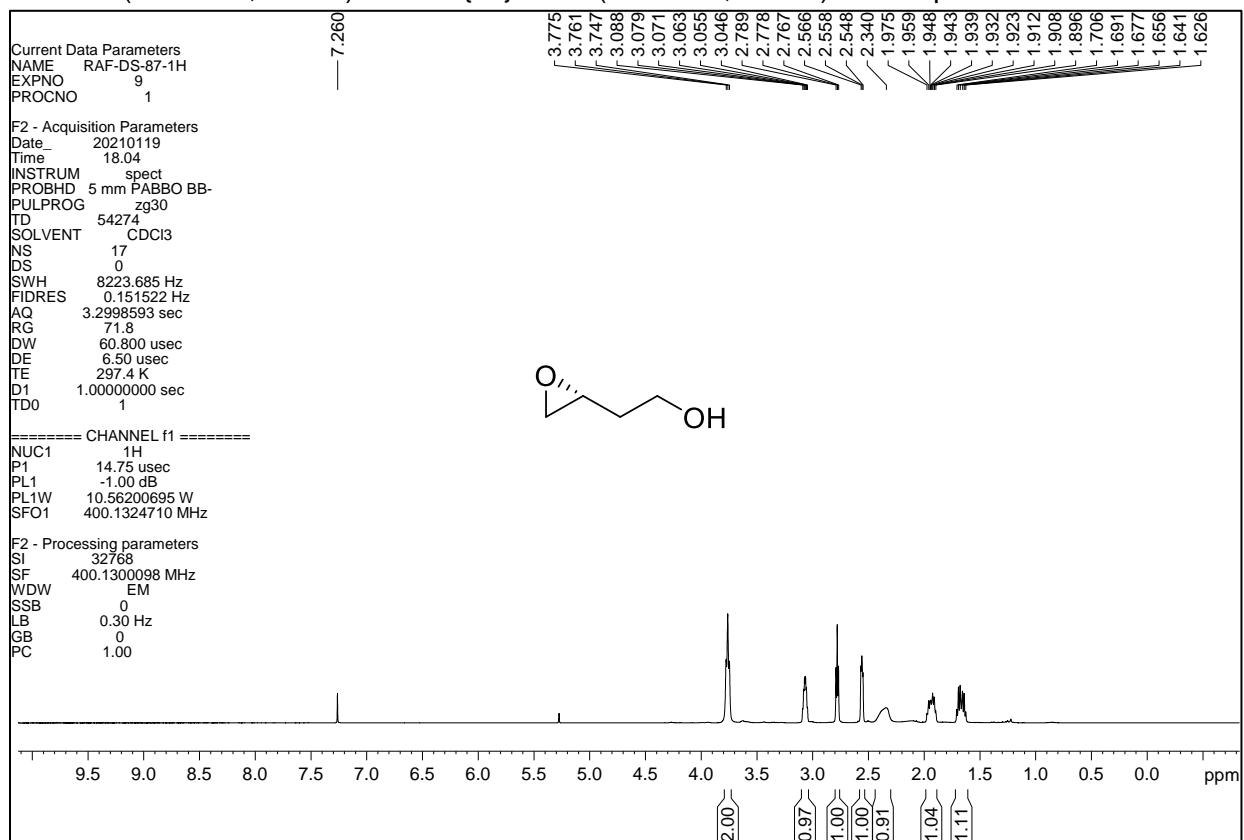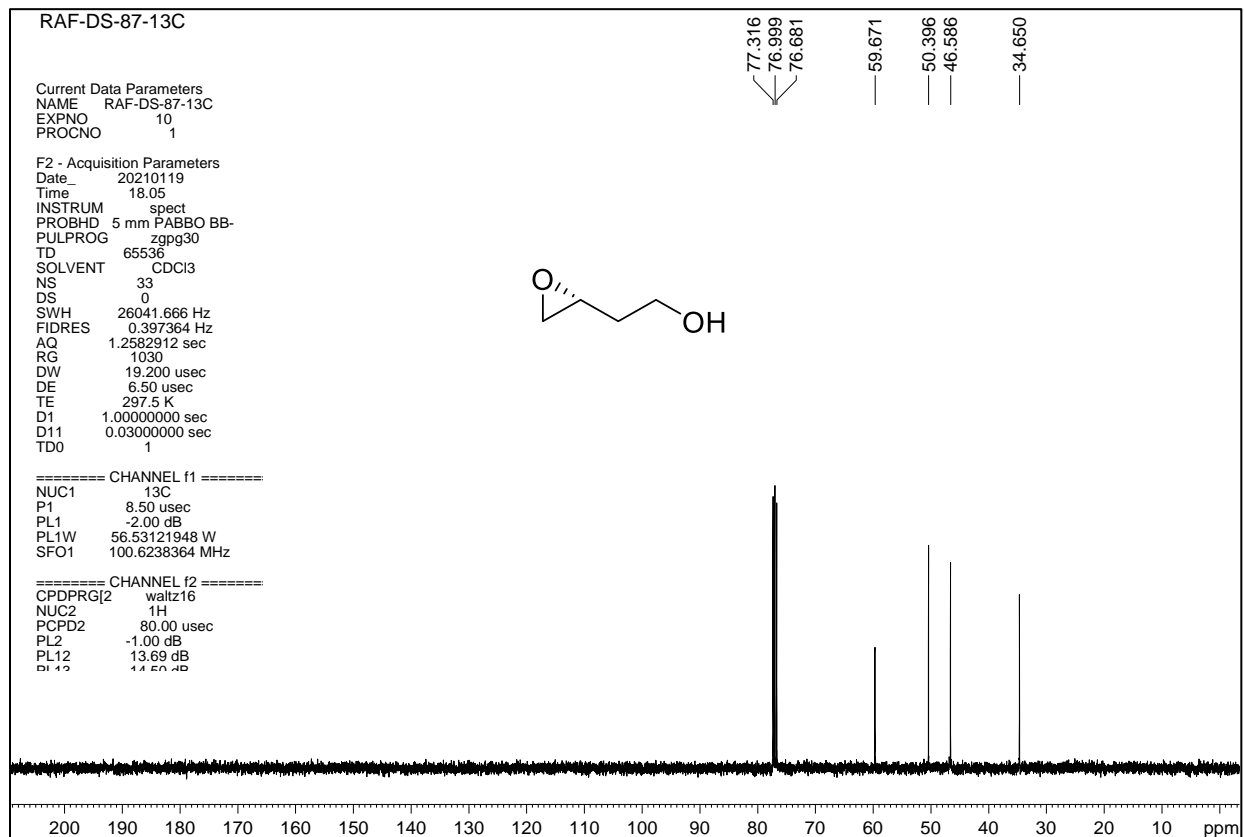

<sup>1</sup>H NMR (500 MHz, CDCl<sub>3</sub>) and <sup>13</sup>C{<sup>1</sup>H} NMR (125 MHz, CDCl<sub>3</sub>) of Compound 11

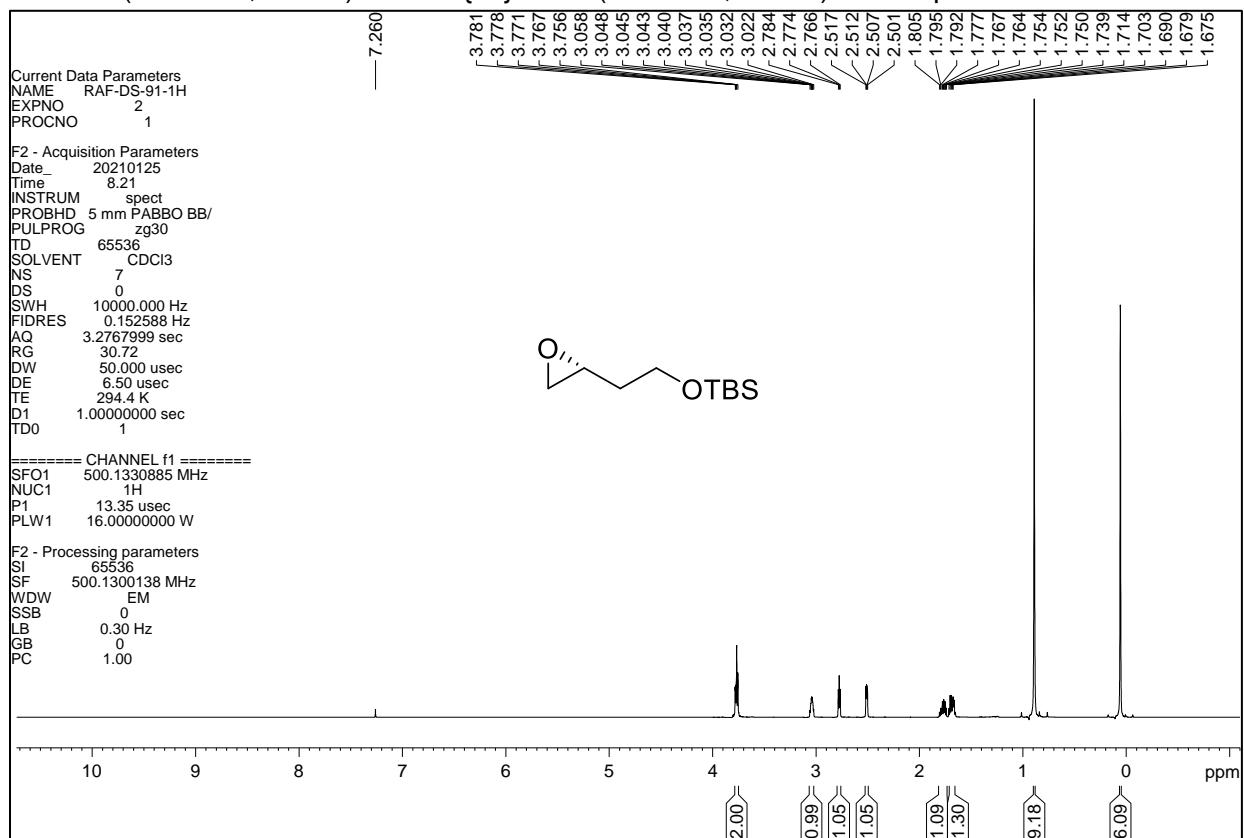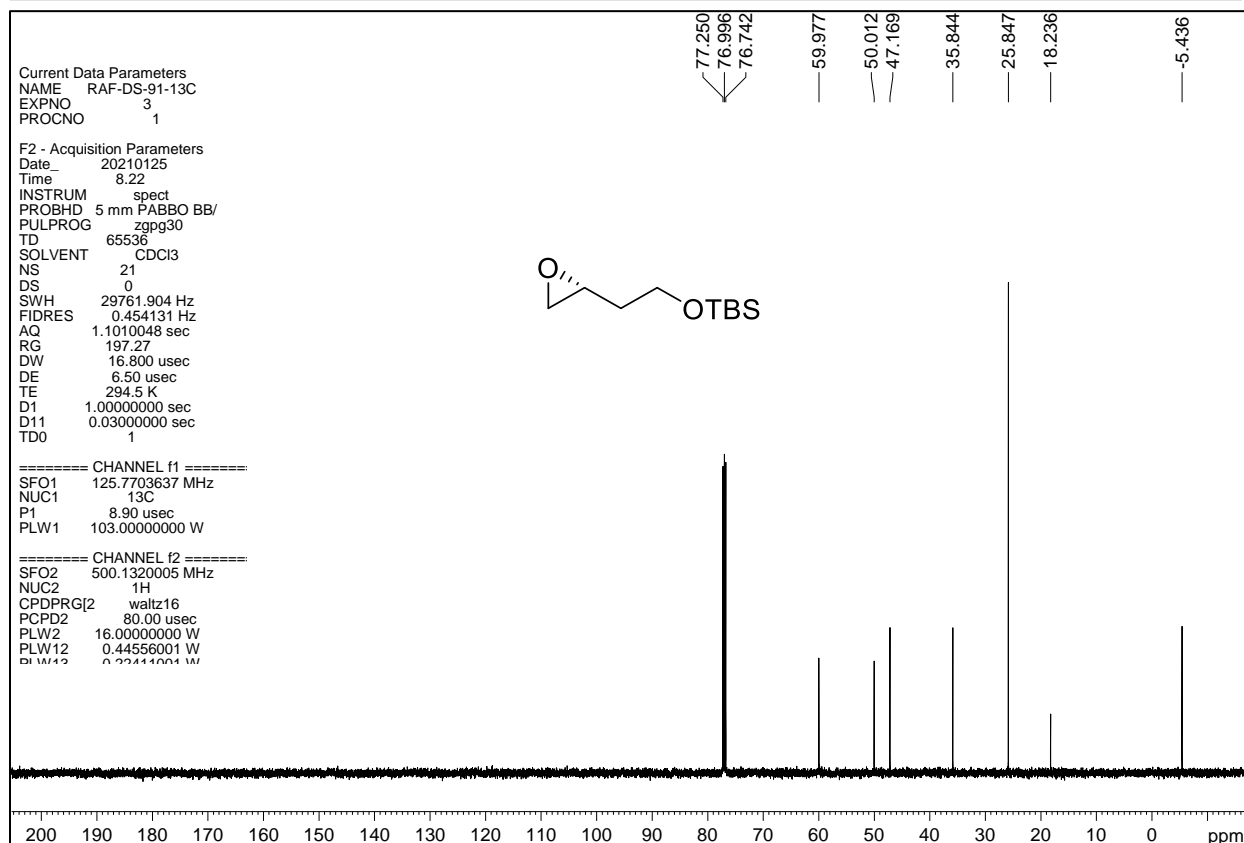

$^1\text{H}$  NMR (500 MHz,  $\text{CDCl}_3$ ) and  $^{13}\text{C}\{^1\text{H}\}$  NMR (125 MHz,  $\text{CDCl}_3$ ) of Compound 7

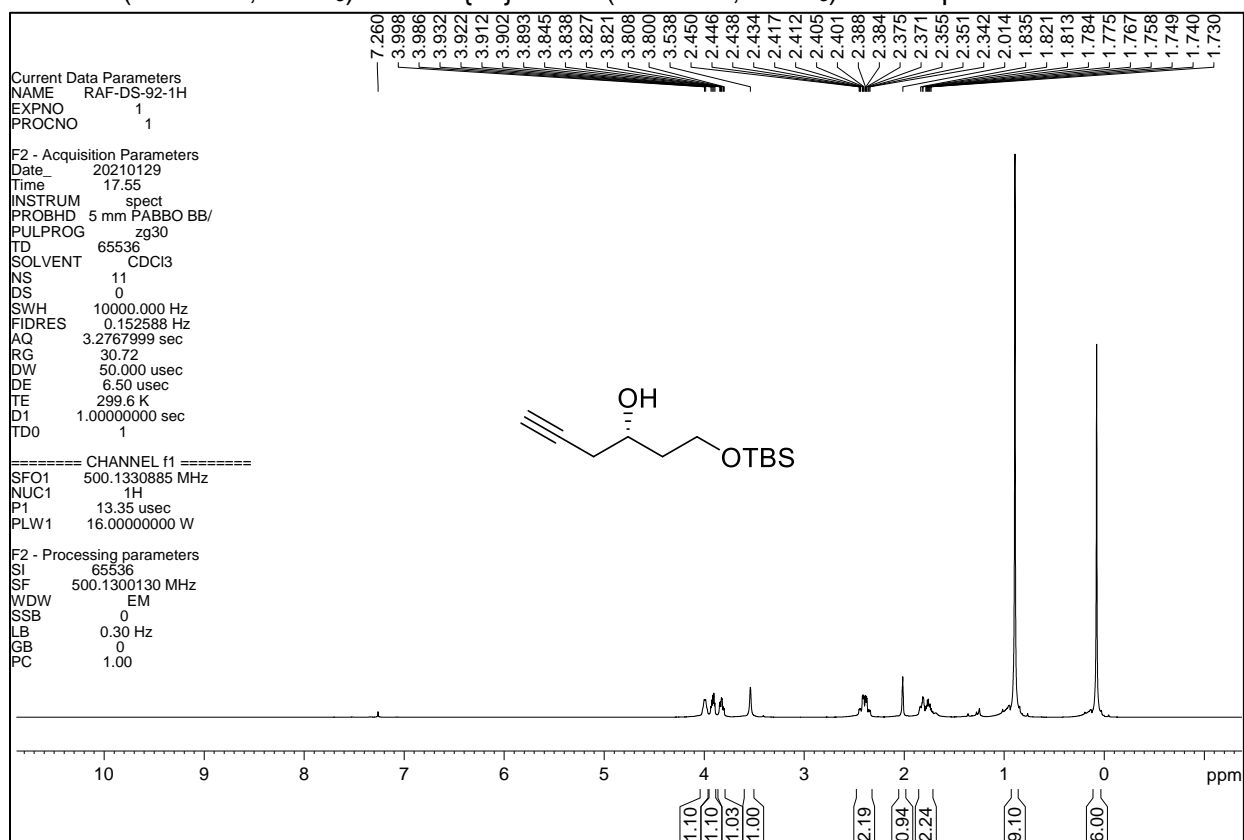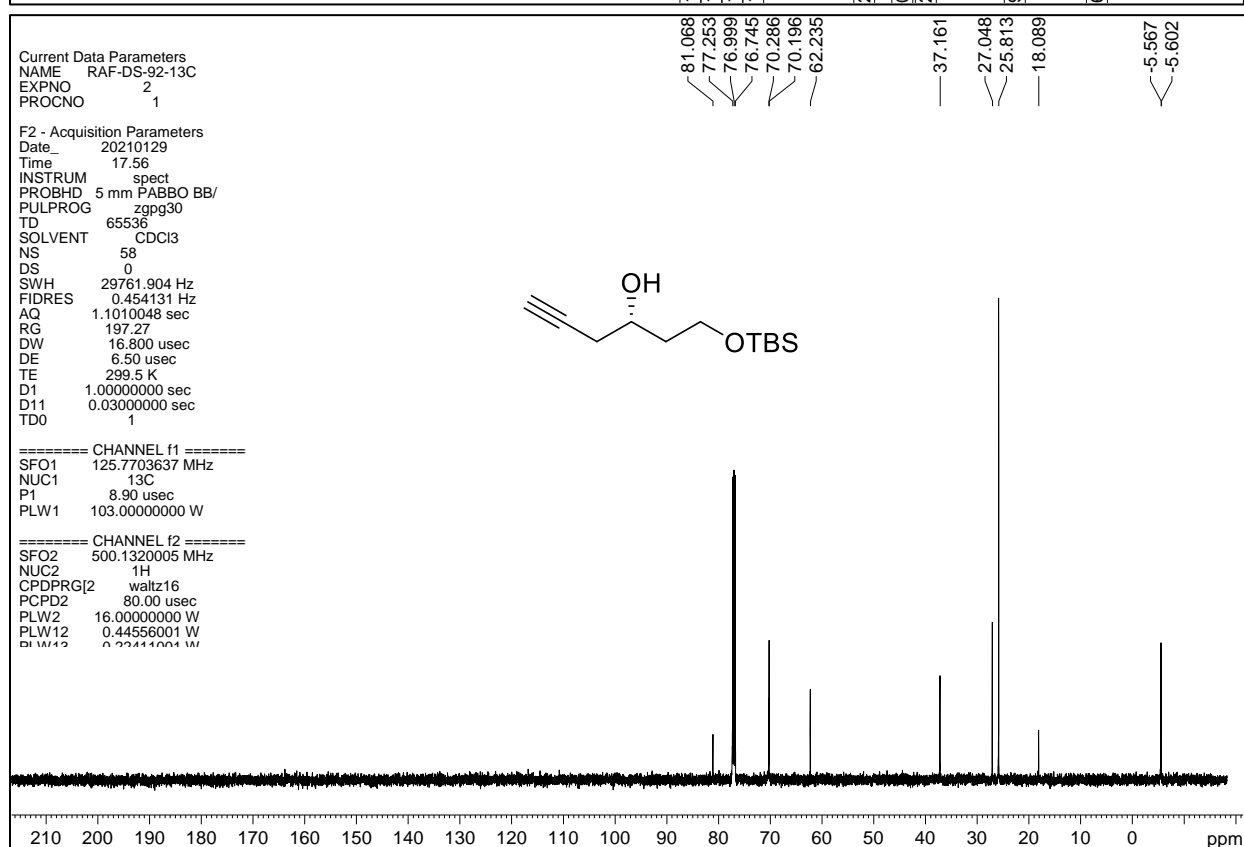

<sup>1</sup>H NMR (400 MHz, CDCl<sub>3</sub>) and <sup>13</sup>C{<sup>1</sup>H} NMR (100 MHz, CDCl<sub>3</sub>) of Compound 6a

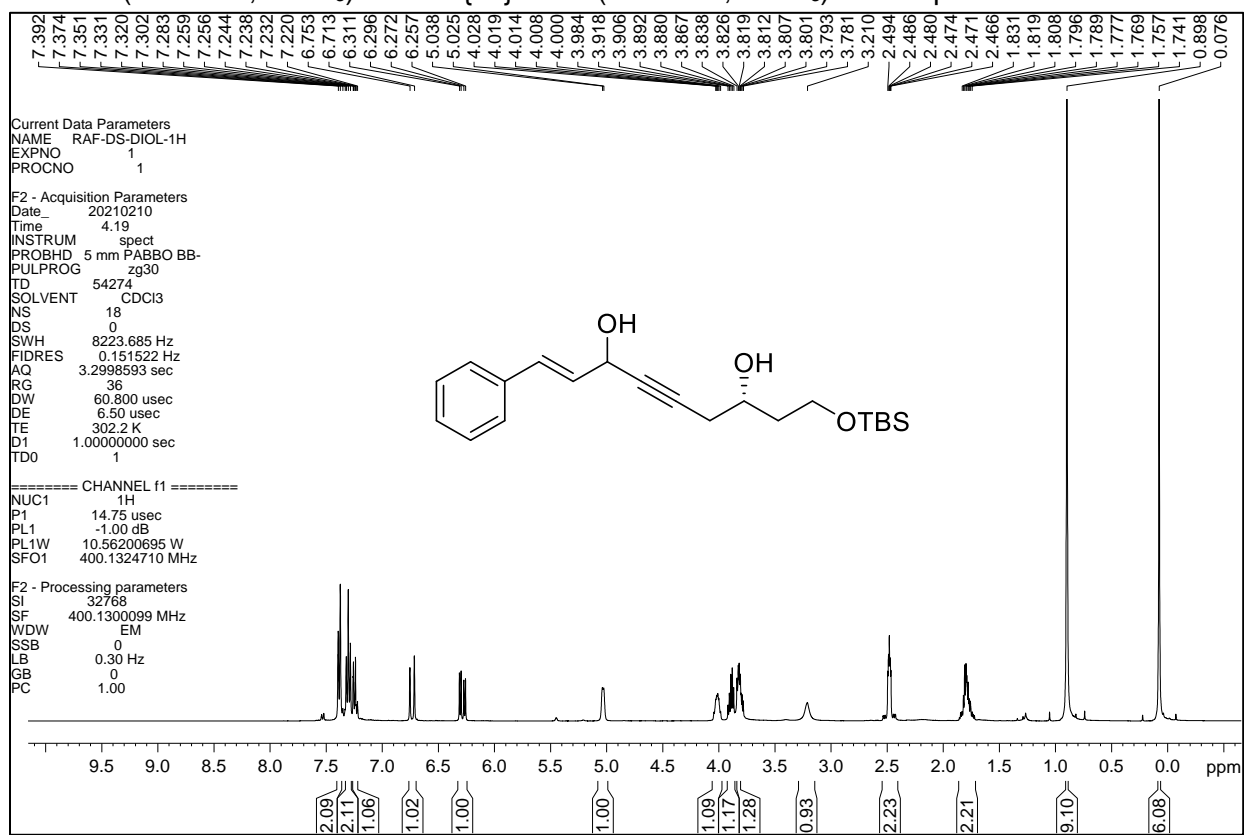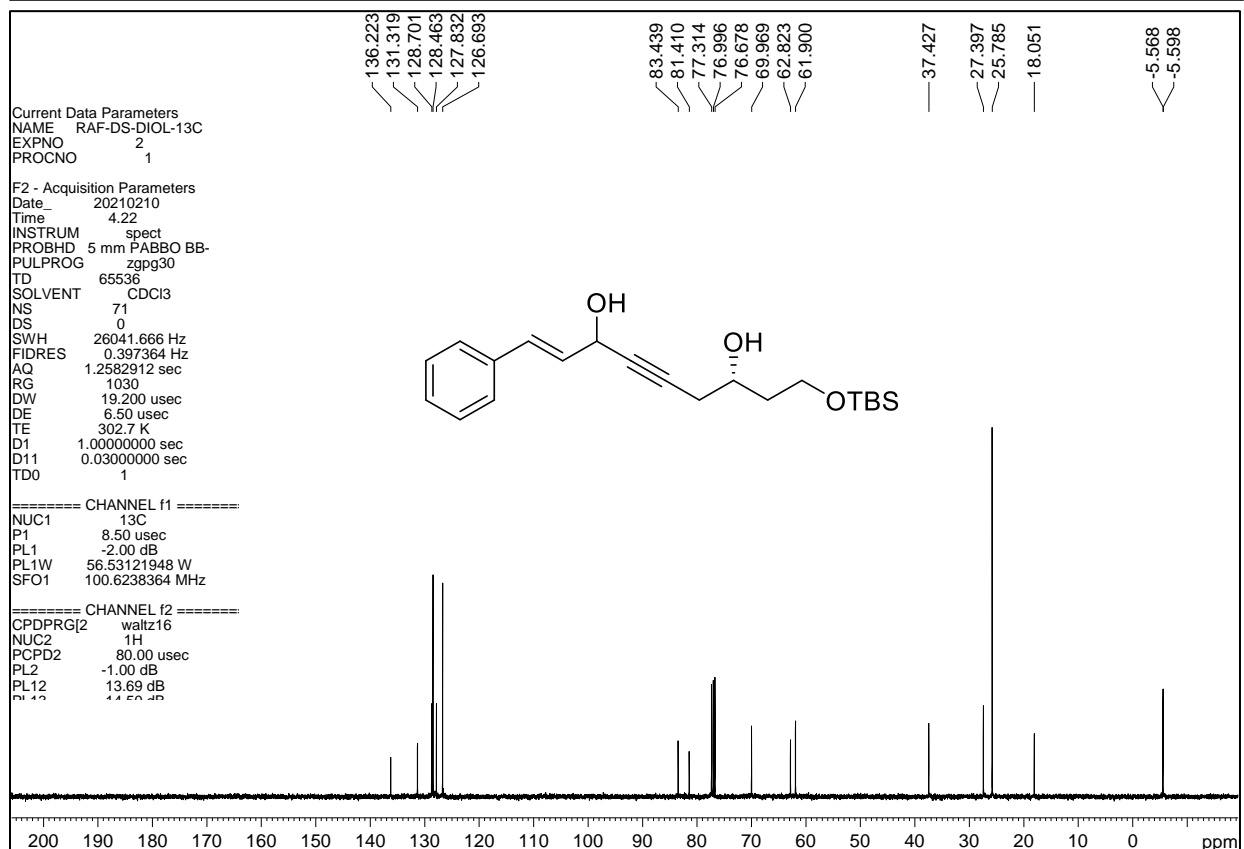

<sup>1</sup>H NMR (500 MHz, CDCl<sub>3</sub>) and <sup>13</sup>C{<sup>1</sup>H} NMR (125 MHz, CDCl<sub>3</sub>) of Compound 12a

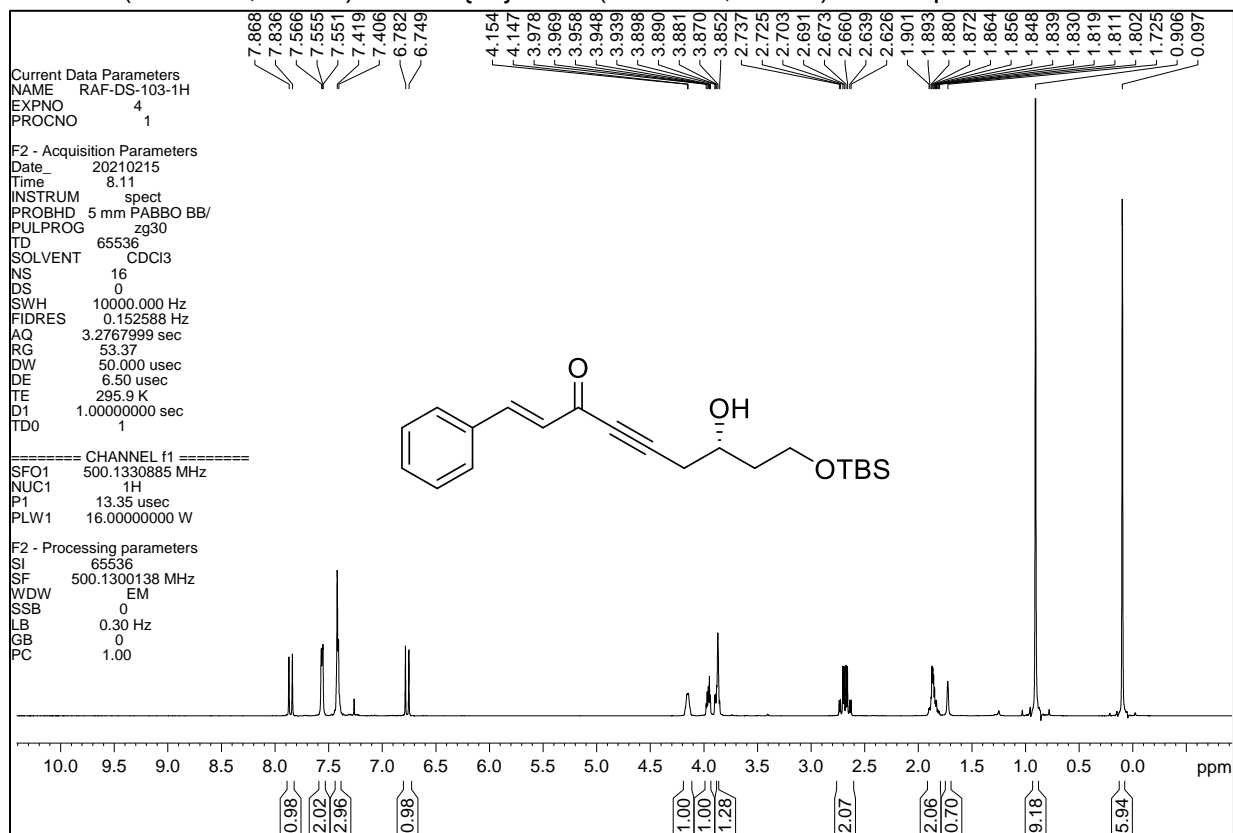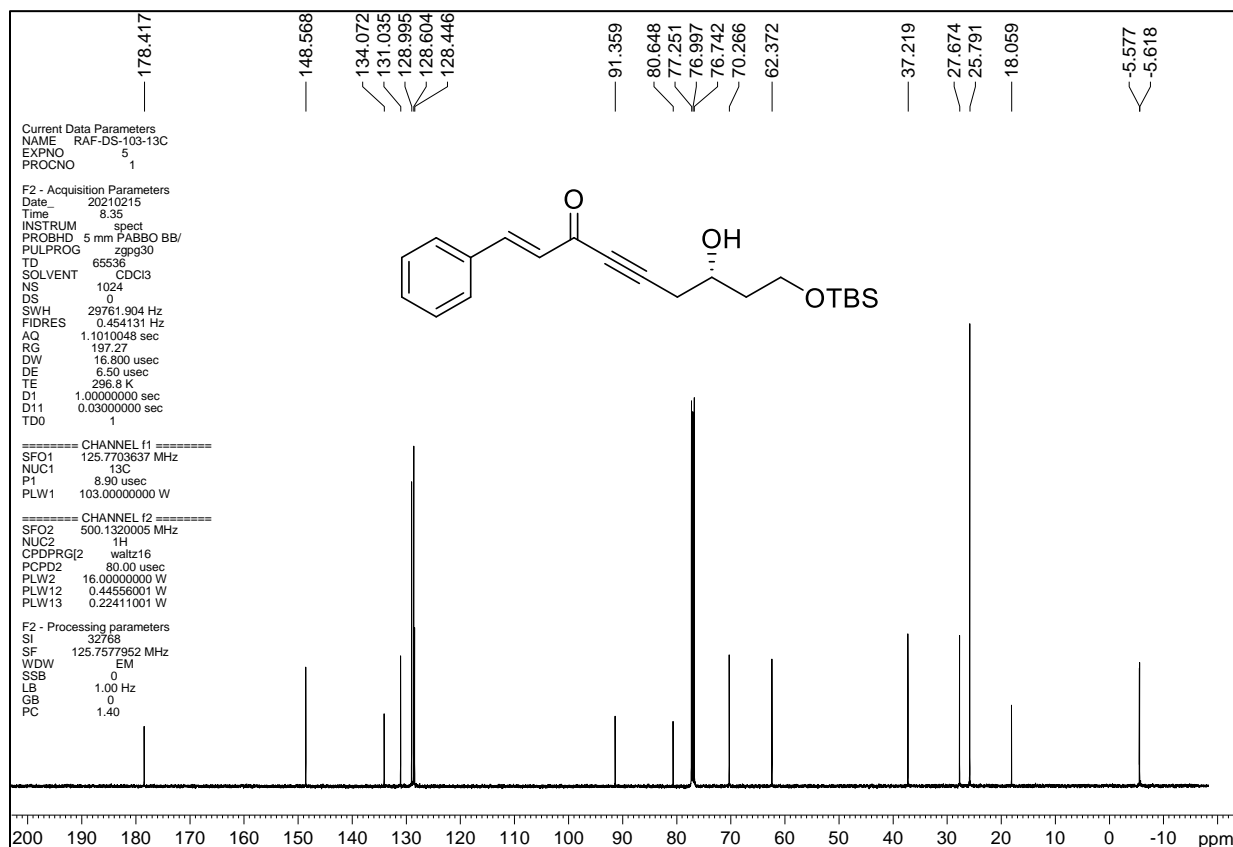

<sup>1</sup>H NMR (500 MHz, CDCl<sub>3</sub>) and <sup>13</sup>C{<sup>1</sup>H} NMR (125 MHz, CDCl<sub>3</sub>) of Compound 5a

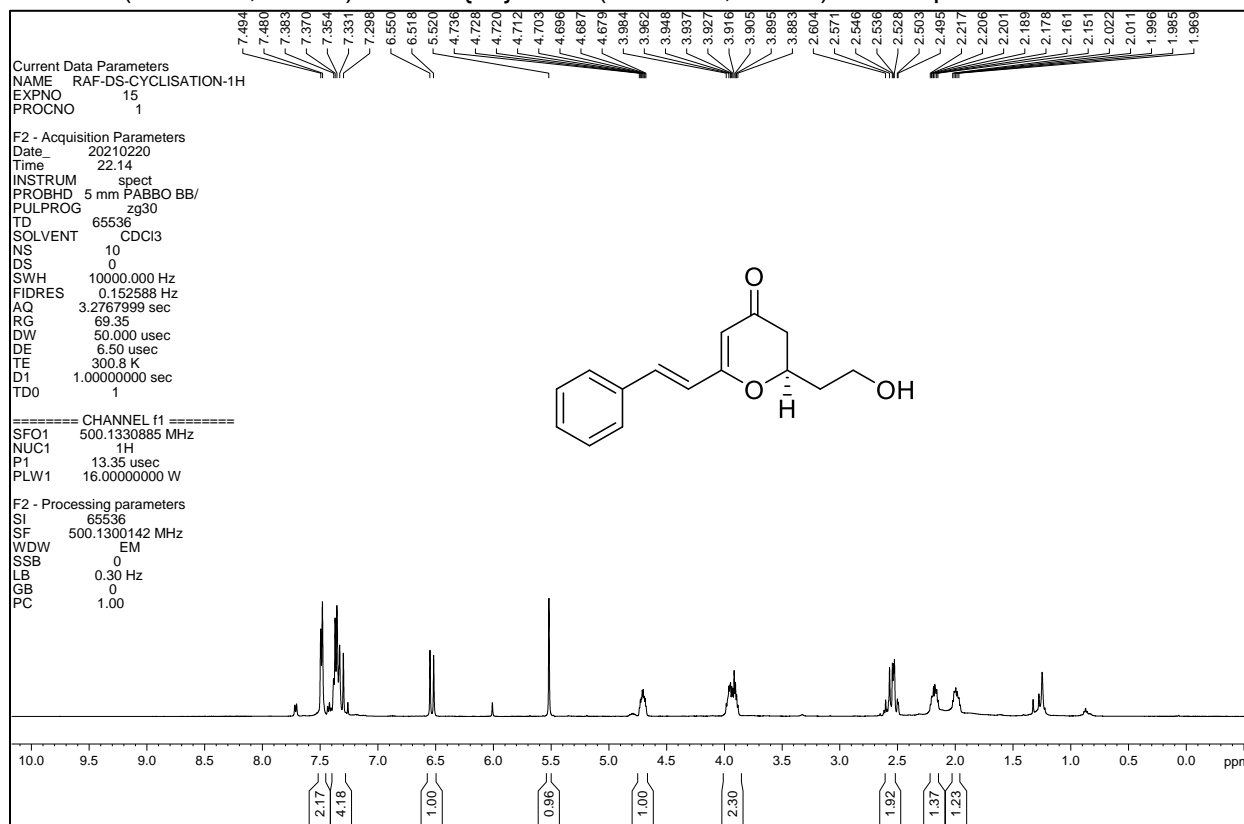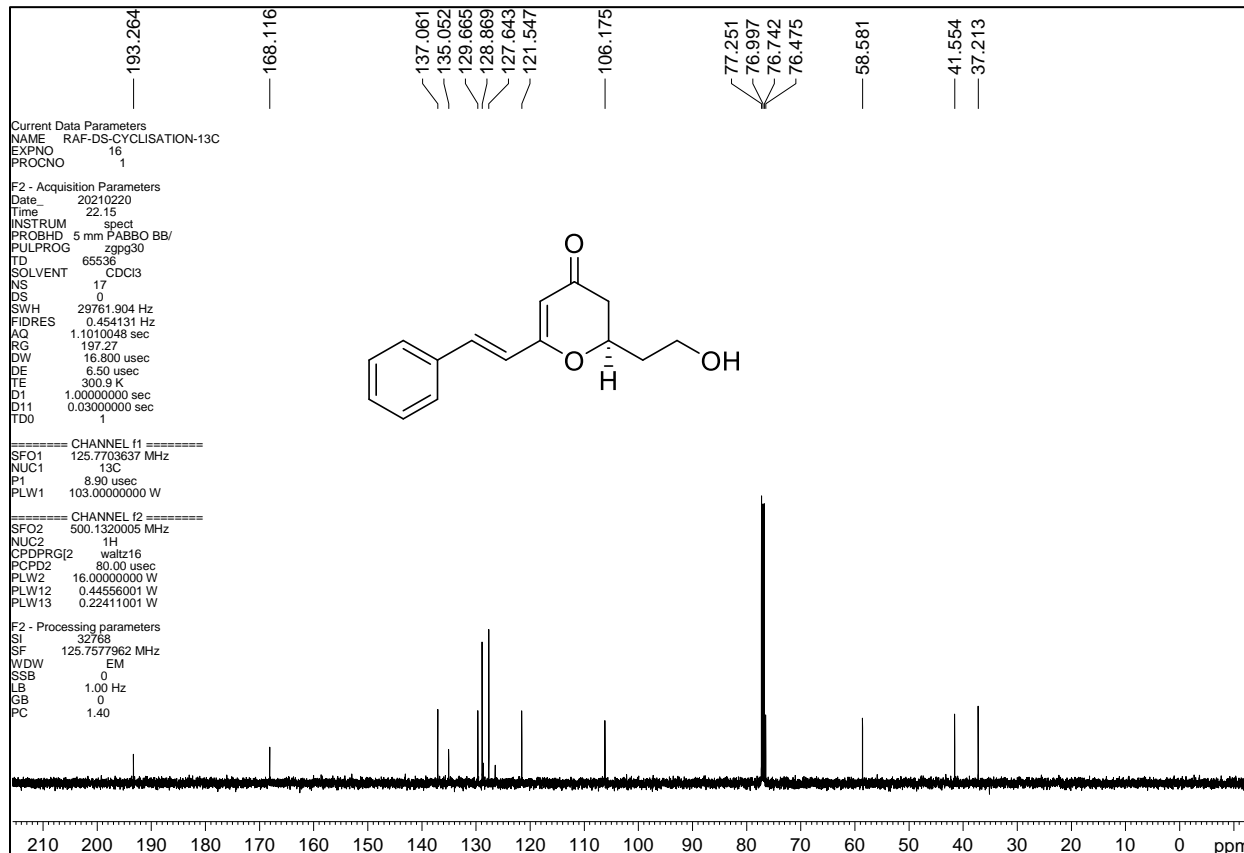

<sup>1</sup>H NMR (400 MHz, CDCl<sub>3</sub>) and <sup>13</sup>C{<sup>1</sup>H} NMR (100 MHz, CDCl<sub>3</sub>) of Compound **13a**

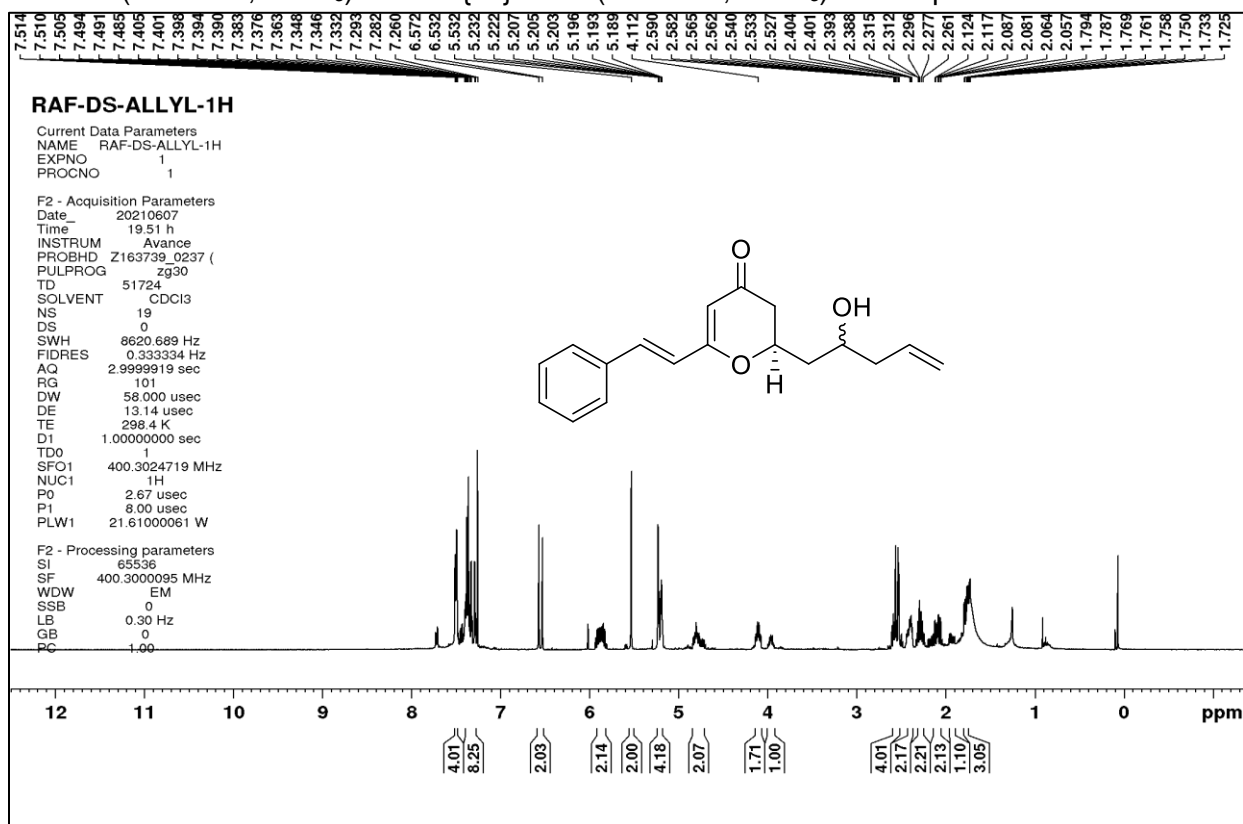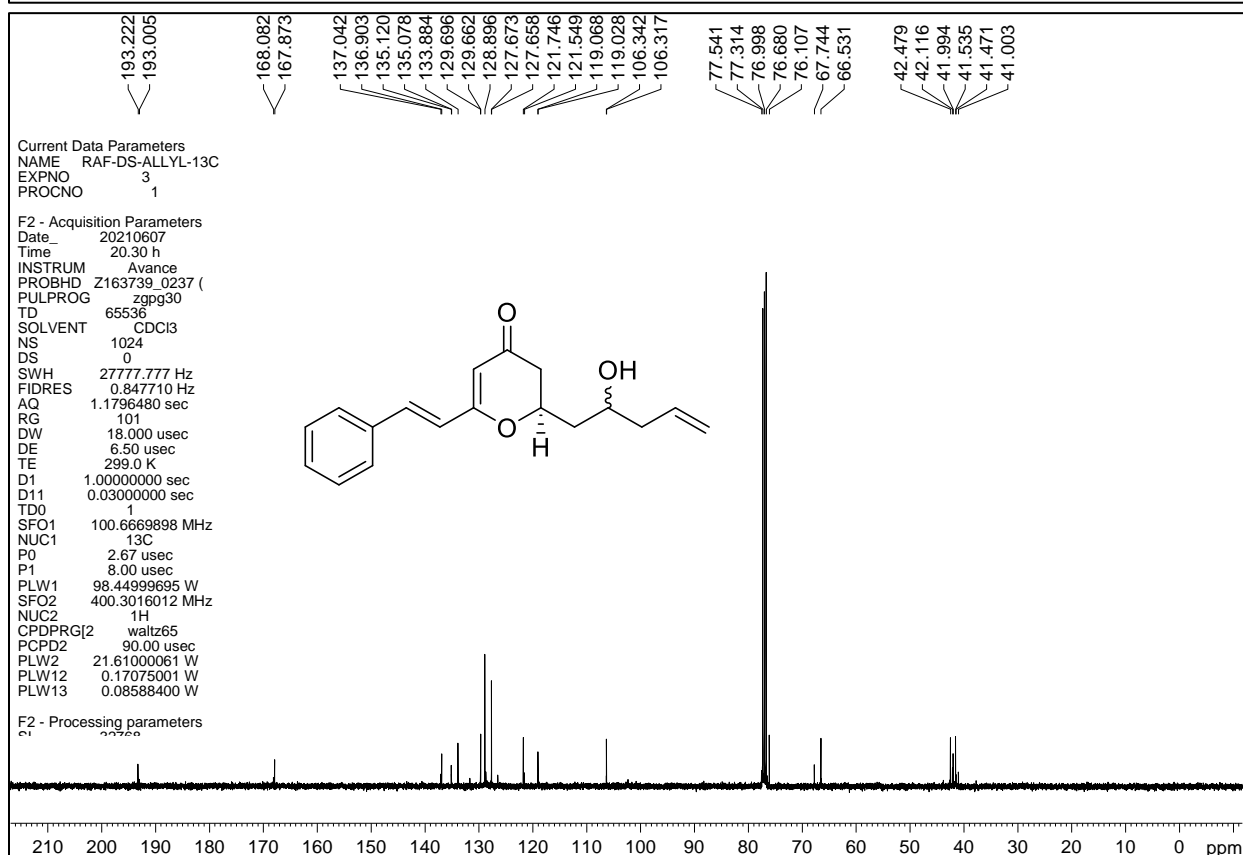



<sup>1</sup>H NMR (400 MHz, CDCl<sub>3</sub>) of Obolactone (1) and reported spectra

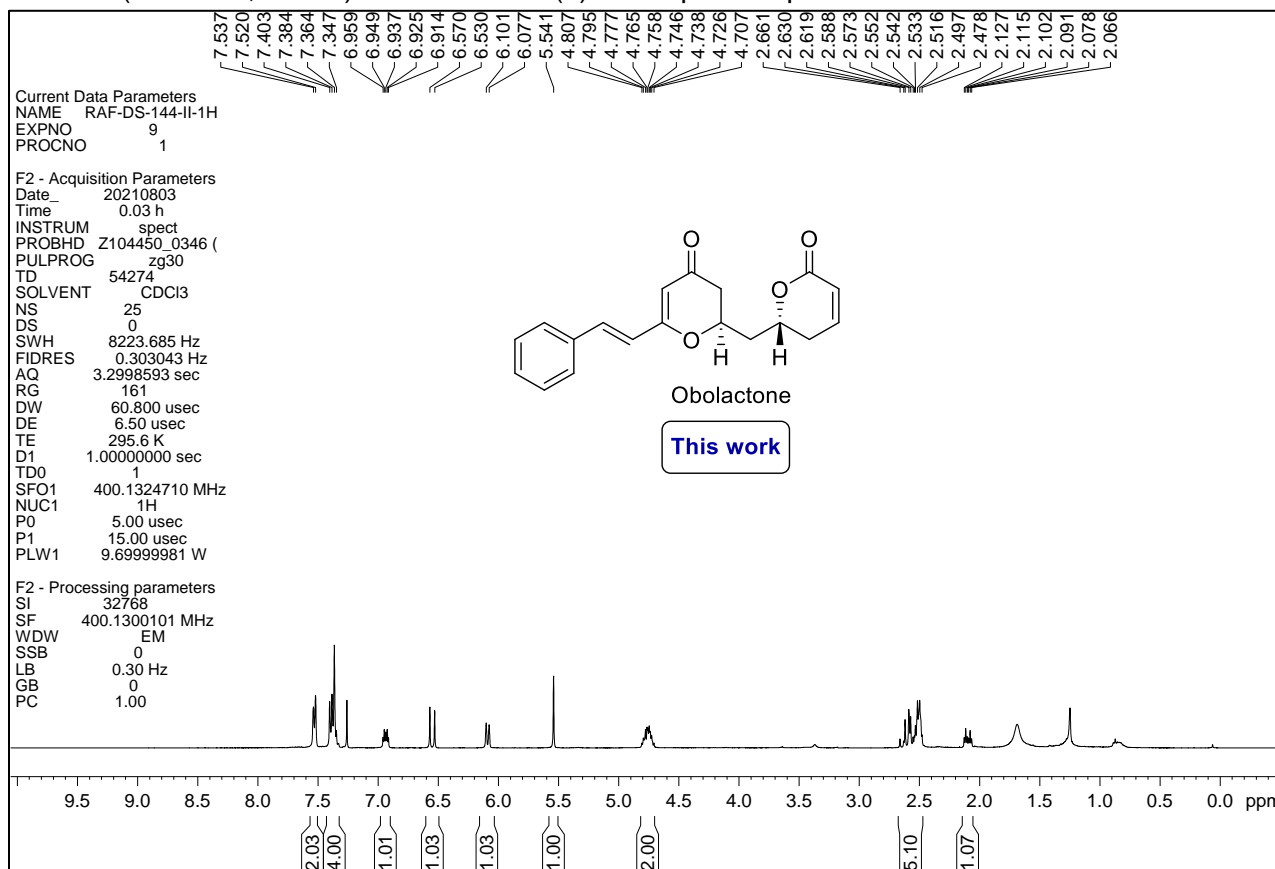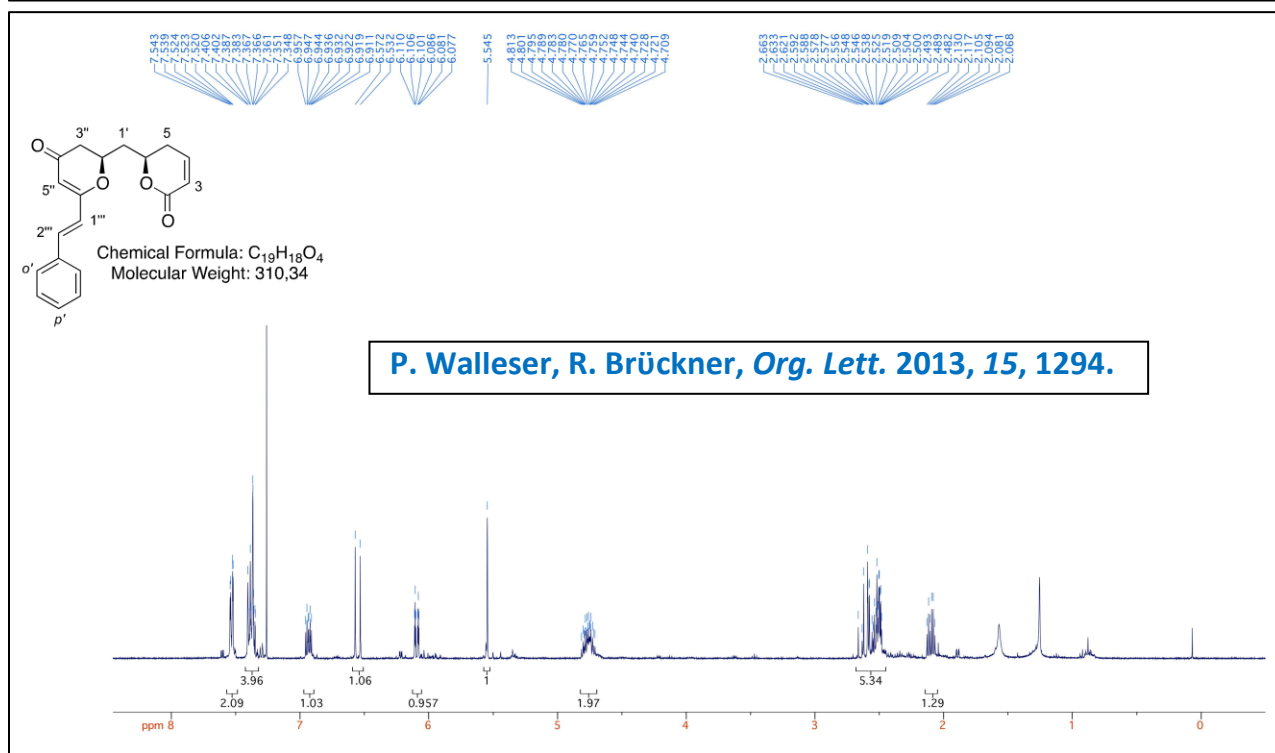

$^{13}\text{C}\{^1\text{H}\}$  NMR (100 MHz,  $\text{CDCl}_3$ ) of Obolactone (1) and reported spectra

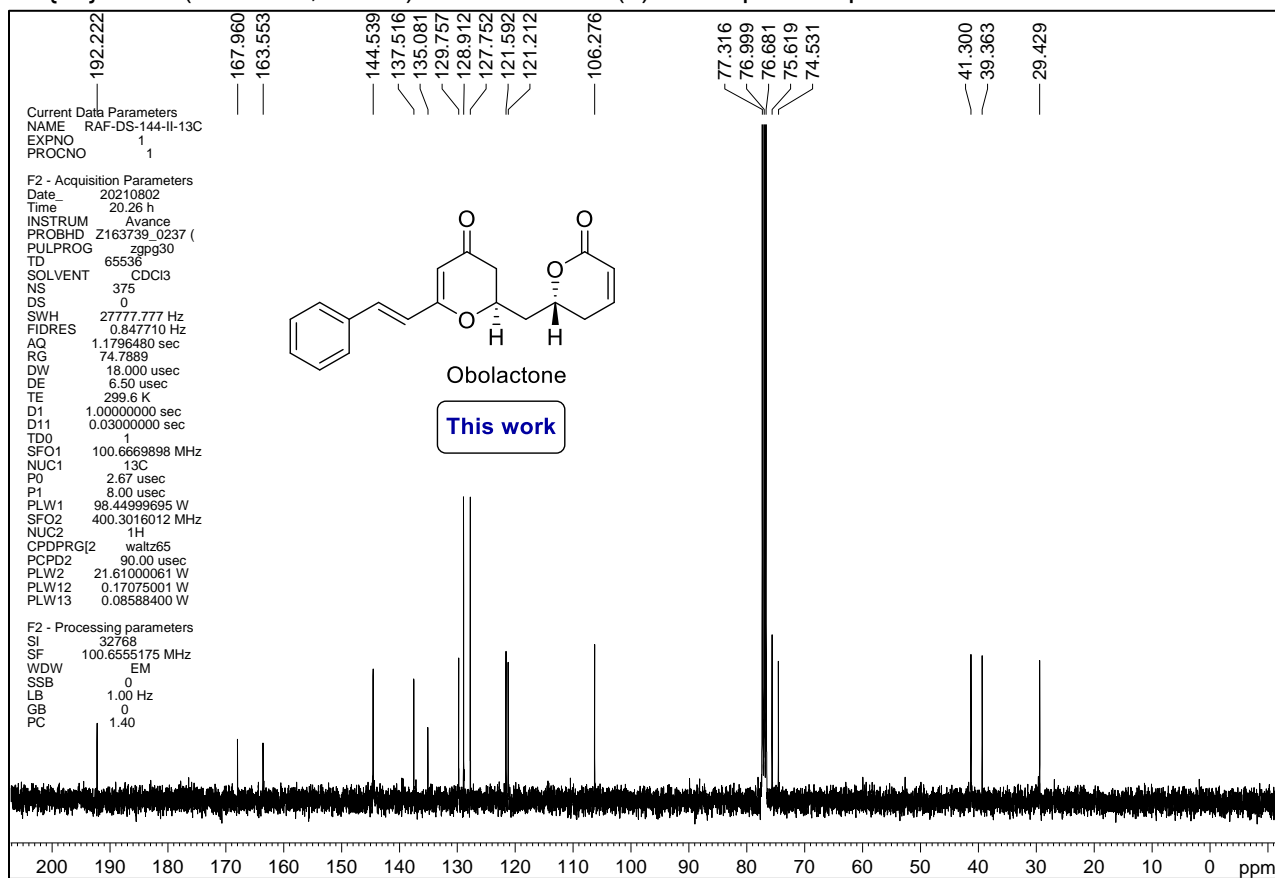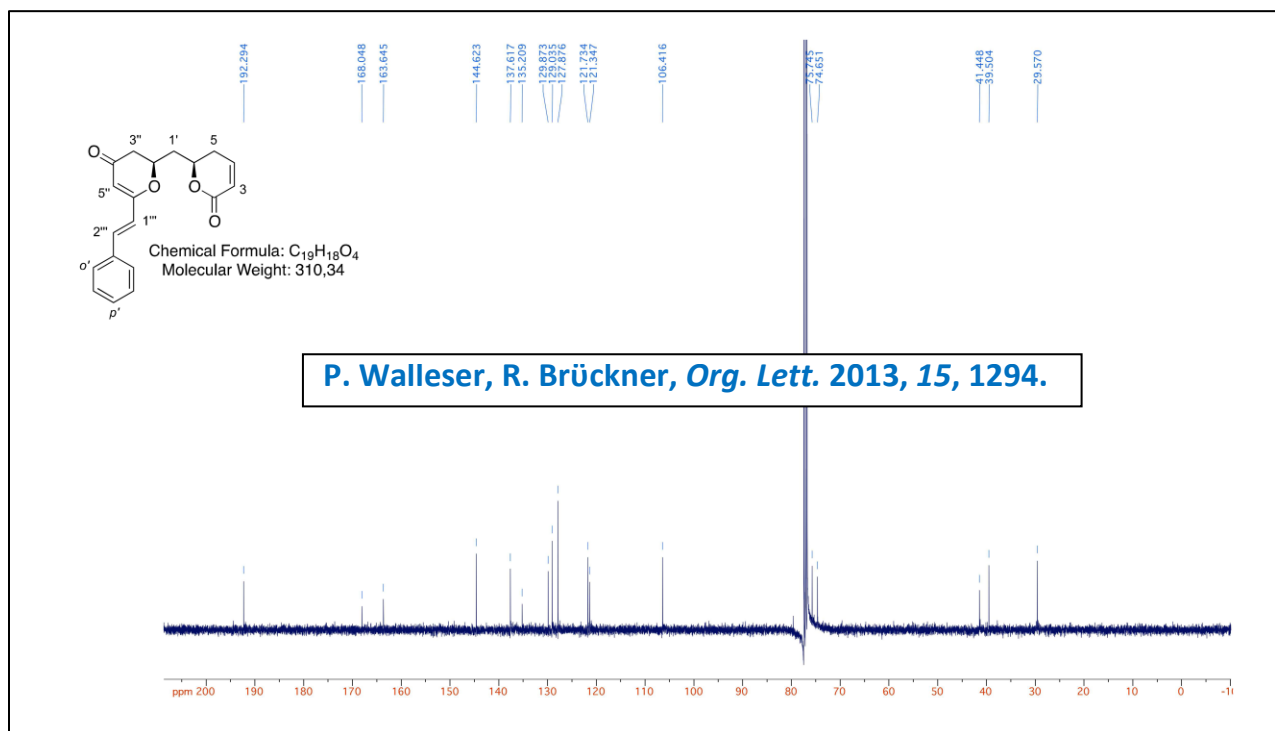

<sup>1</sup>H NMR (400 MHz, CDCl<sub>3</sub>) 6-*epi*-Obolactone (1') and reported spectra

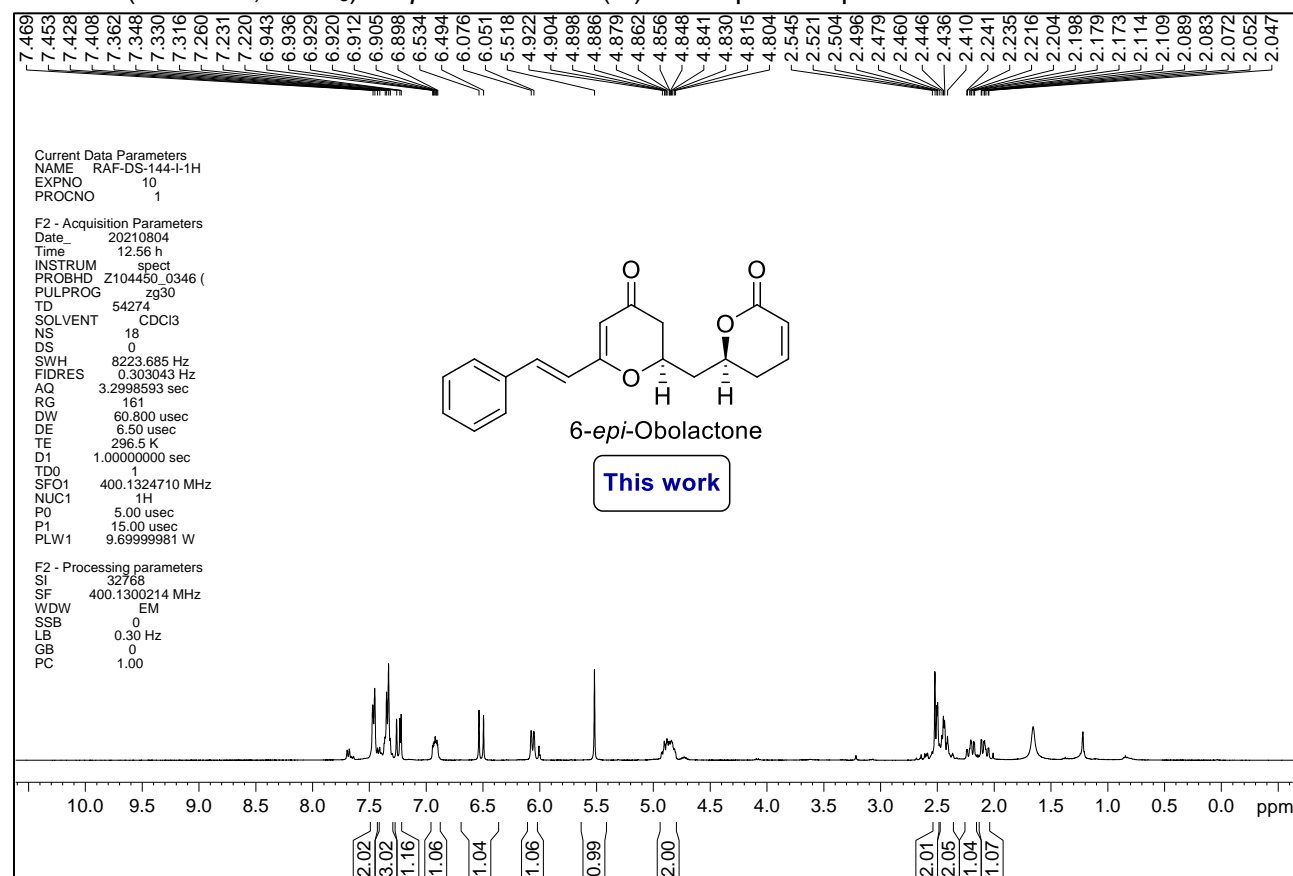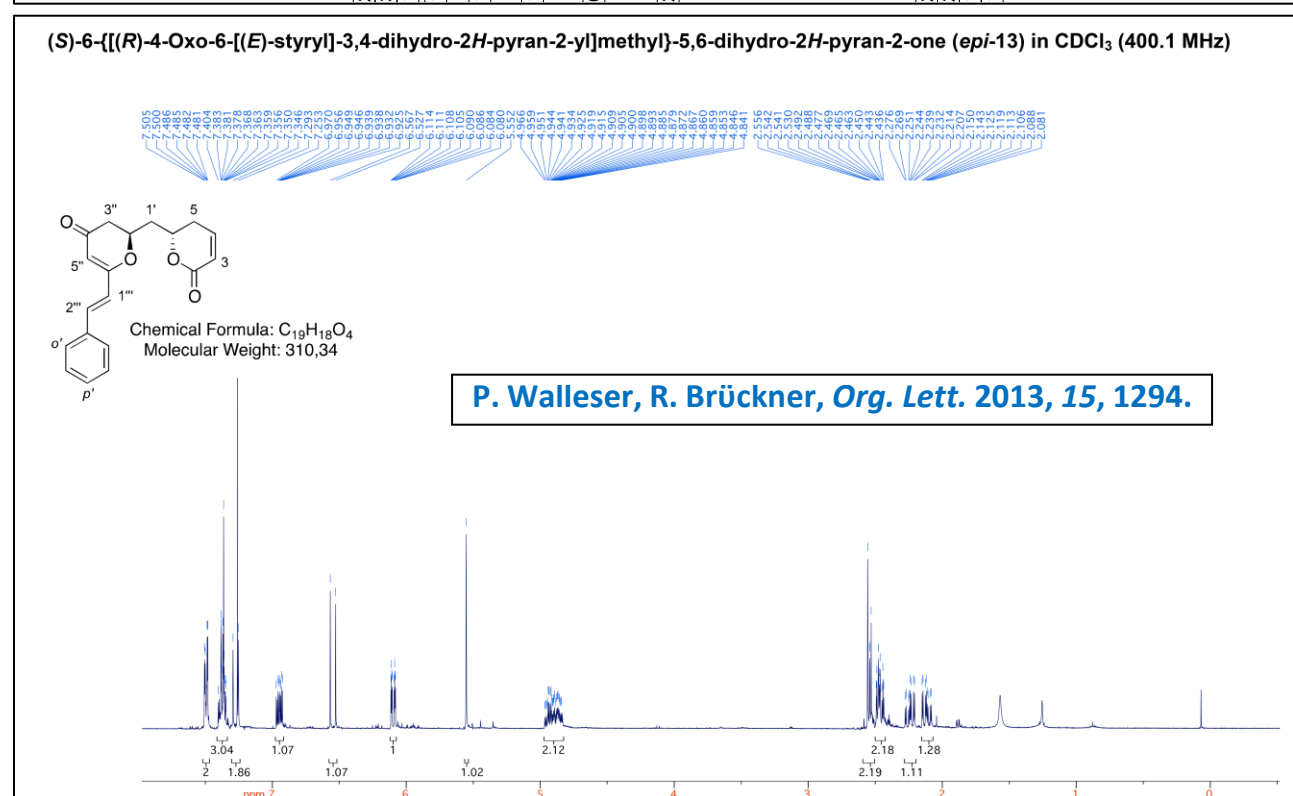

$^{13}\text{C}\{^1\text{H}\}$  NMR (100 MHz,  $\text{CDCl}_3$ ) of 6-*epi*-Obolactone (1') and reported spectra

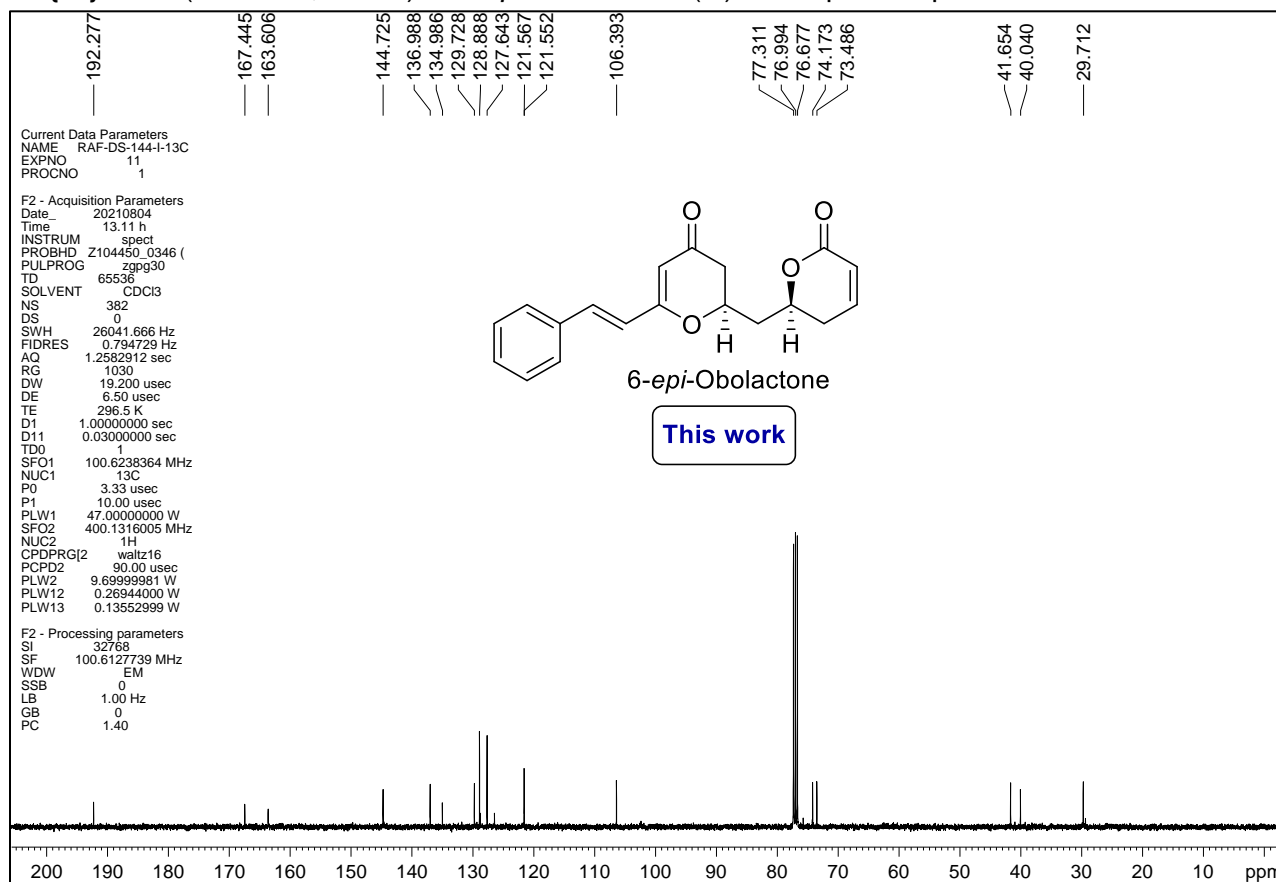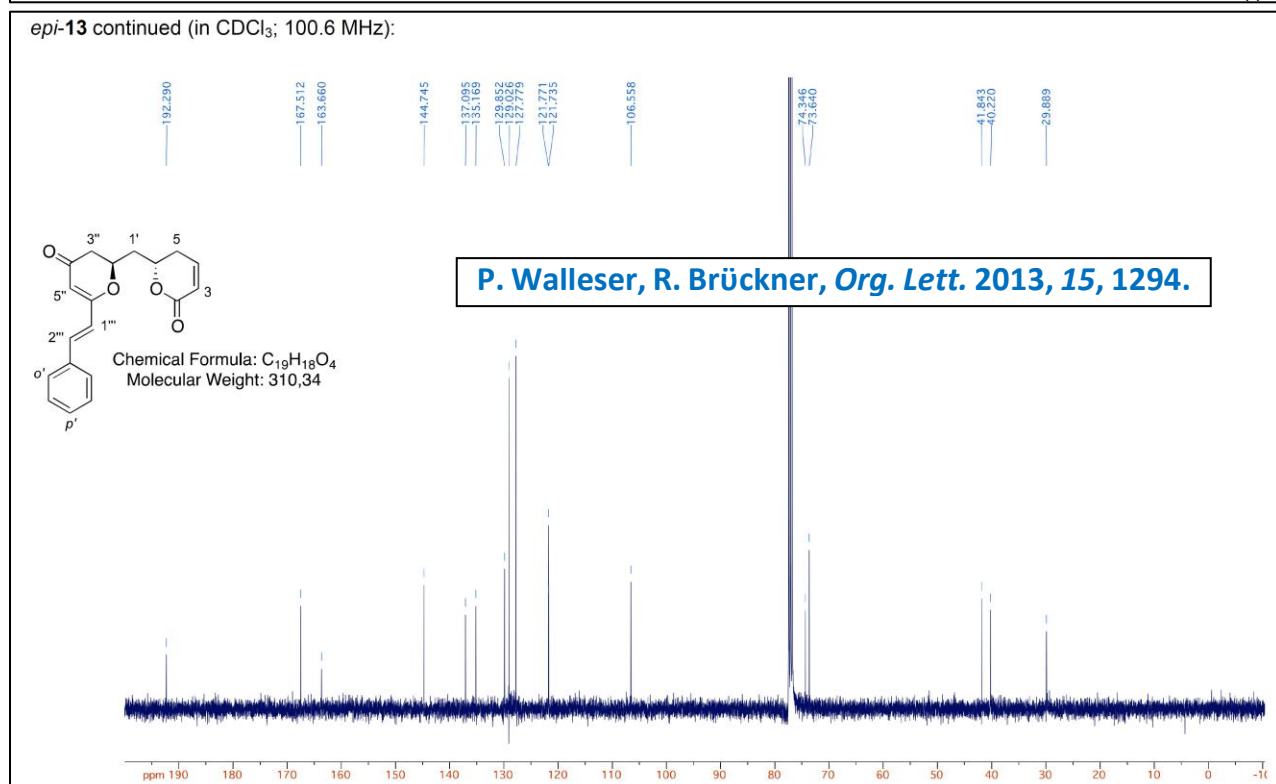

<sup>1</sup>H NMR (500 MHz, CDCl<sub>3</sub>) and <sup>13</sup>C{<sup>1</sup>H} NMR (125 MHz, CDCl<sub>3</sub>) of Compound **6b**

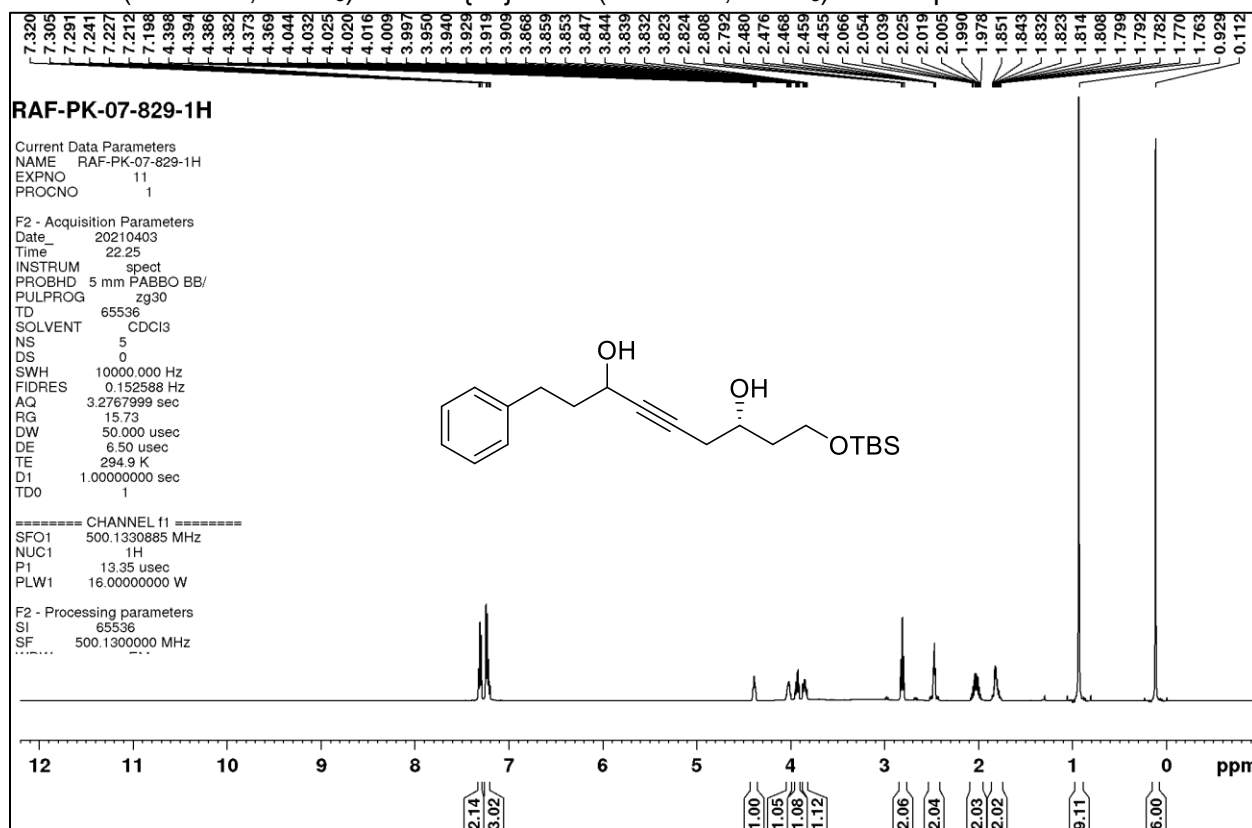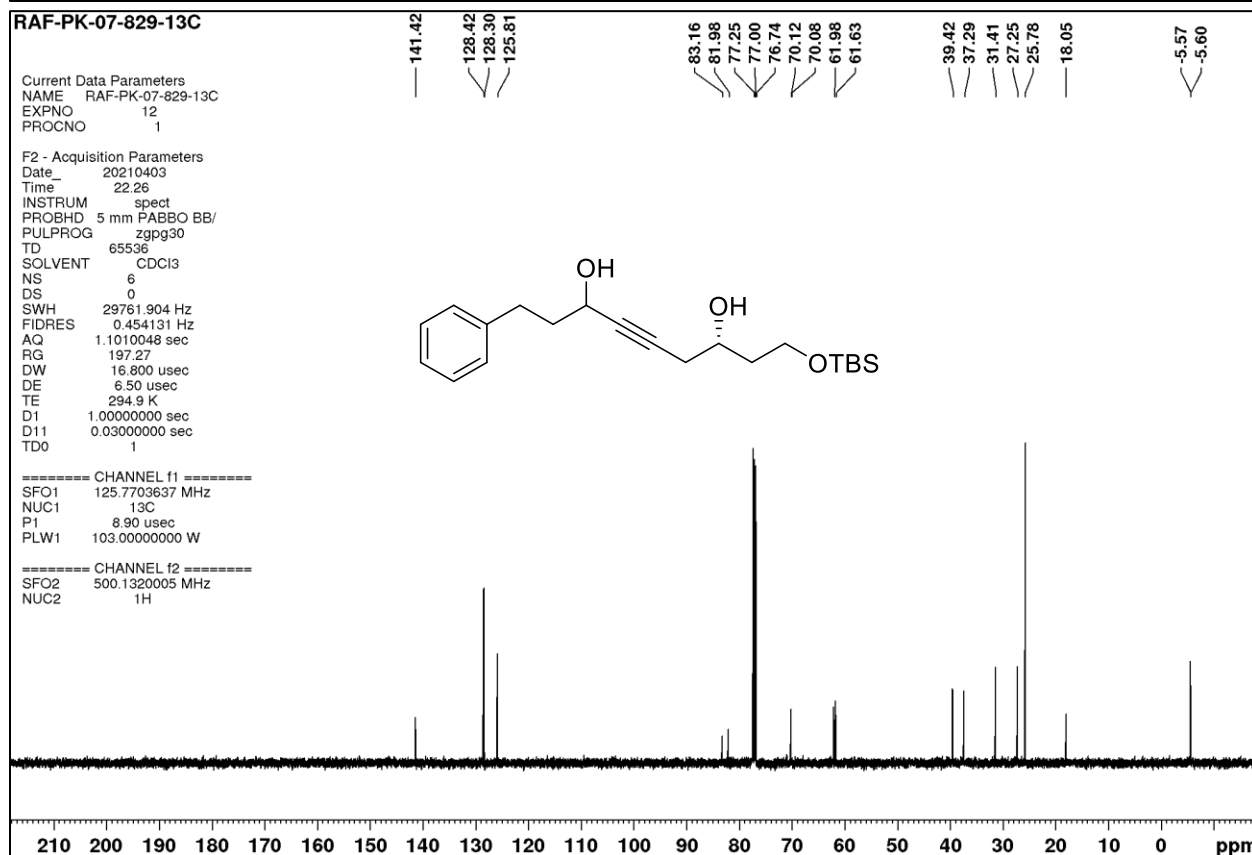

<sup>1</sup>H NMR (500 MHz, CDCl<sub>3</sub>) and <sup>13</sup>C{<sup>1</sup>H} NMR (125 MHz, CDCl<sub>3</sub>) of Compound 12b

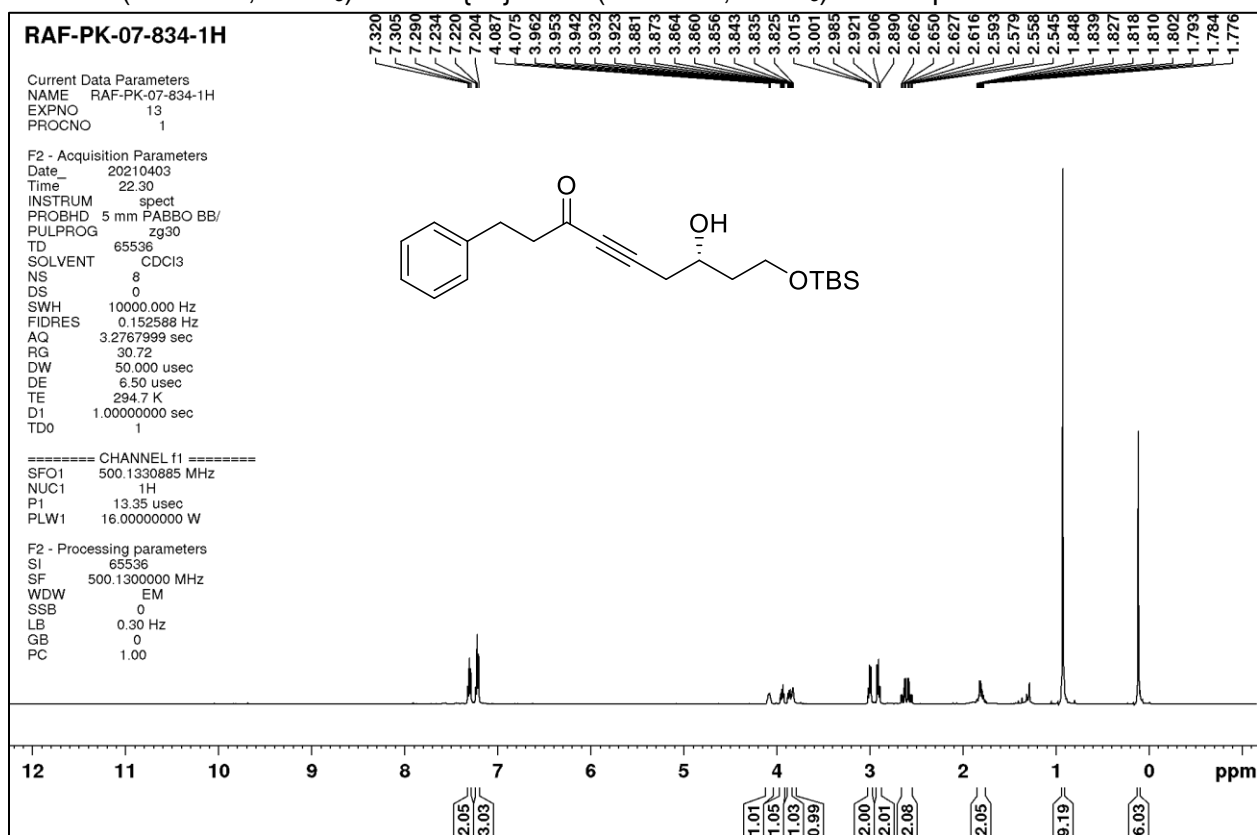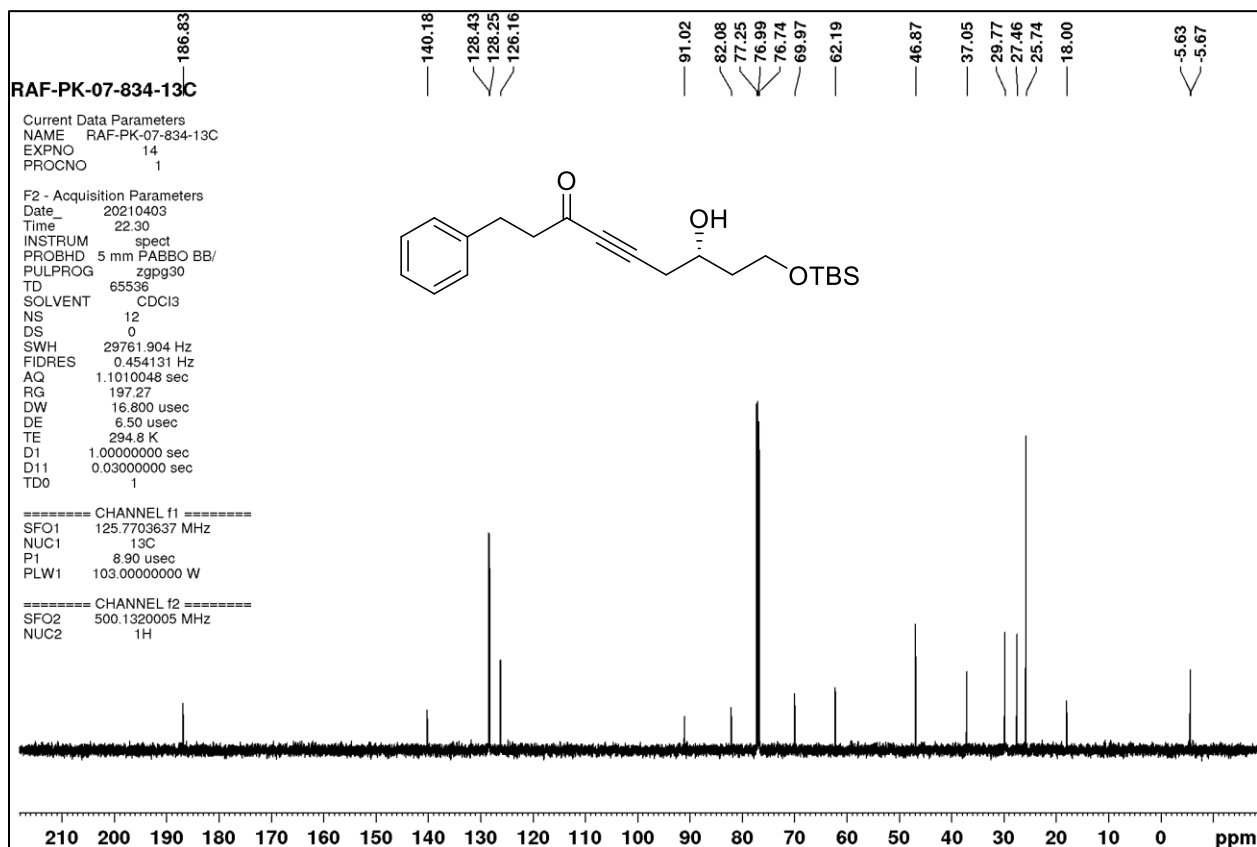

<sup>1</sup>H NMR (500 MHz, CDCl<sub>3</sub>) and <sup>13</sup>C{<sup>1</sup>H} NMR (125 MHz, CDCl<sub>3</sub>) of Compound **5b**

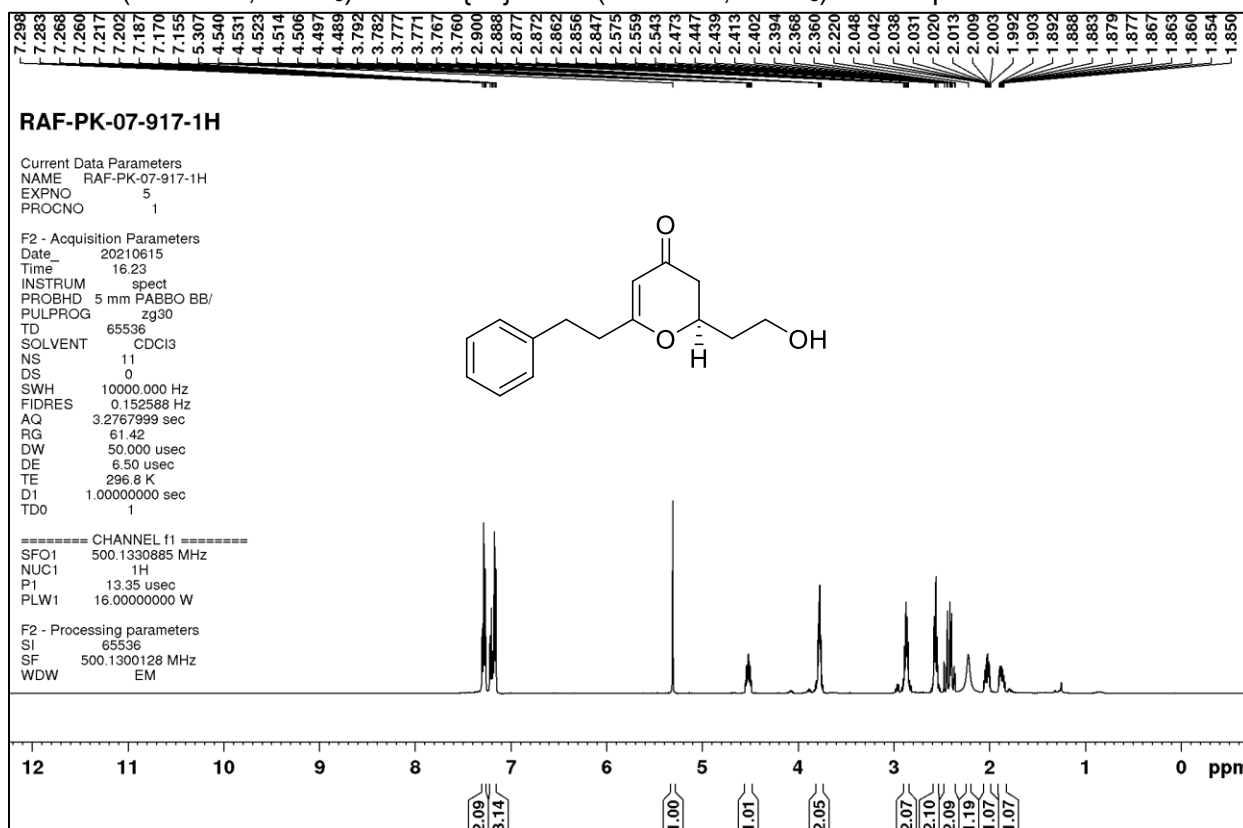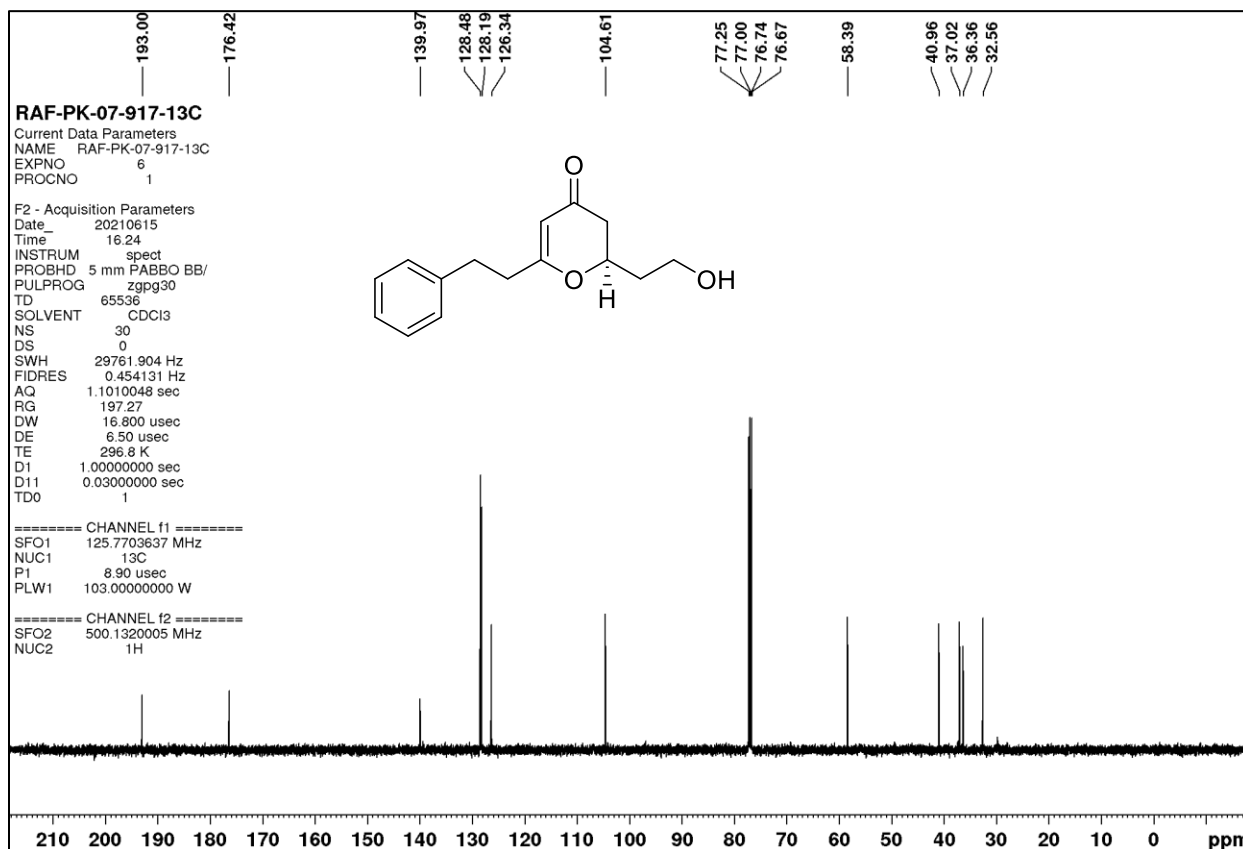

<sup>1</sup>H NMR (400 MHz, CDCl<sub>3</sub>) and <sup>13</sup>C{<sup>1</sup>H} NMR (100 MHz, CDCl<sub>3</sub>) of Compound 13b

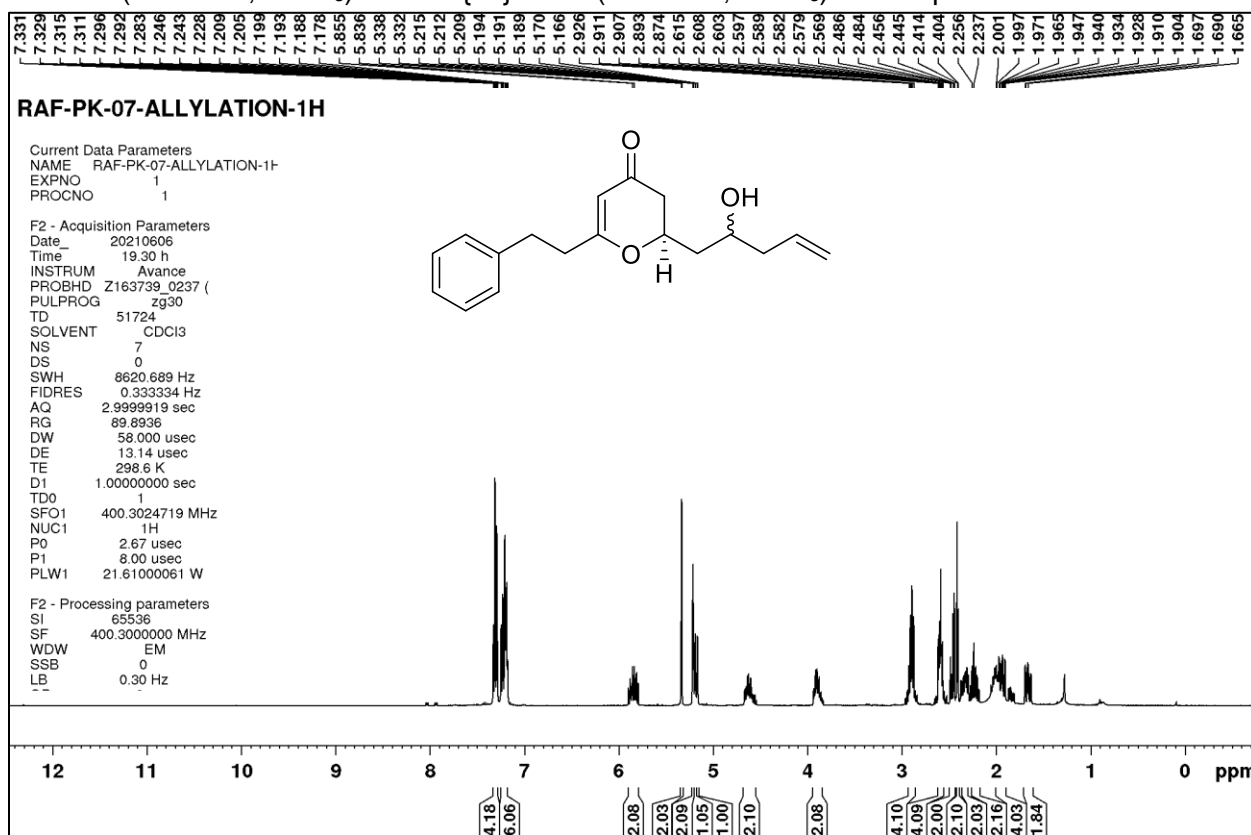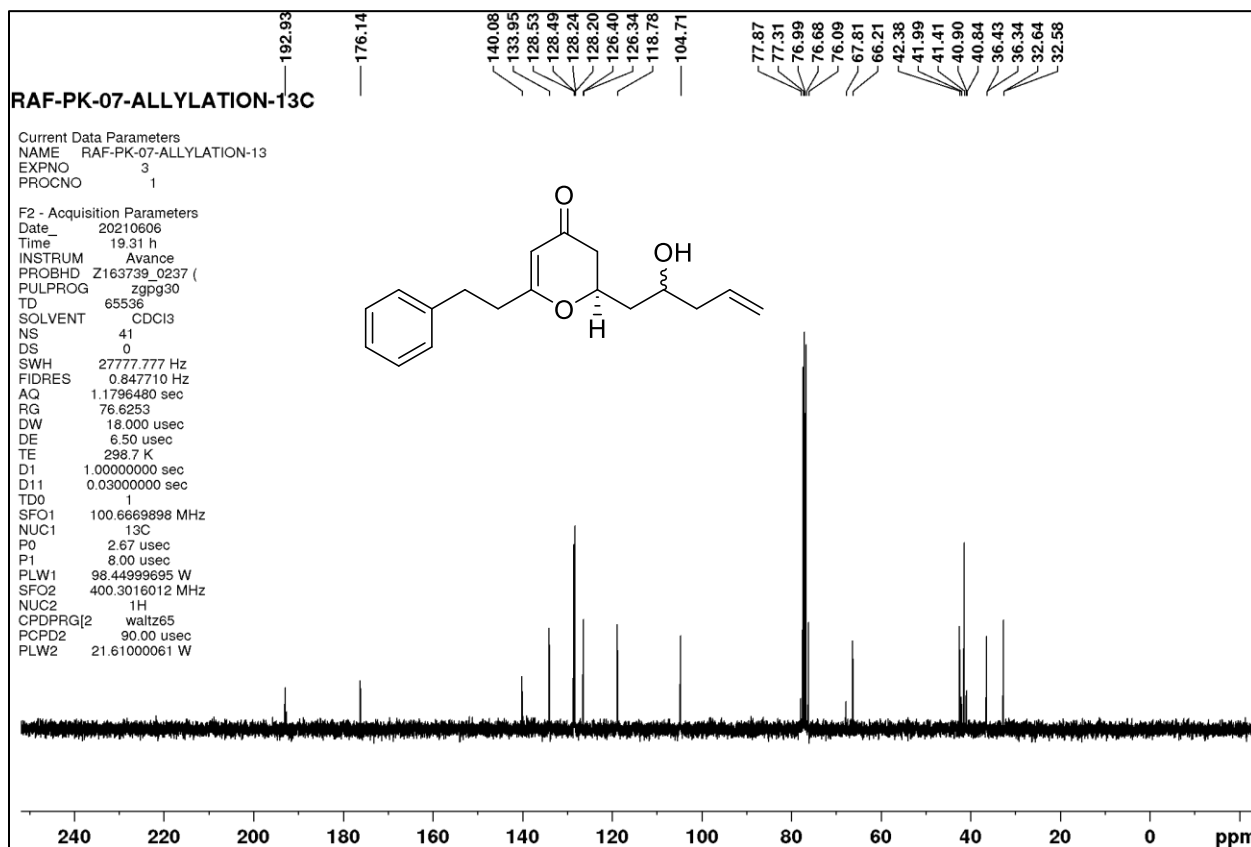



<sup>1</sup>H NMR (400 MHz, CDCl<sub>3</sub>) of 7',8'-dihydrobolactone (**2**) and reported spectra

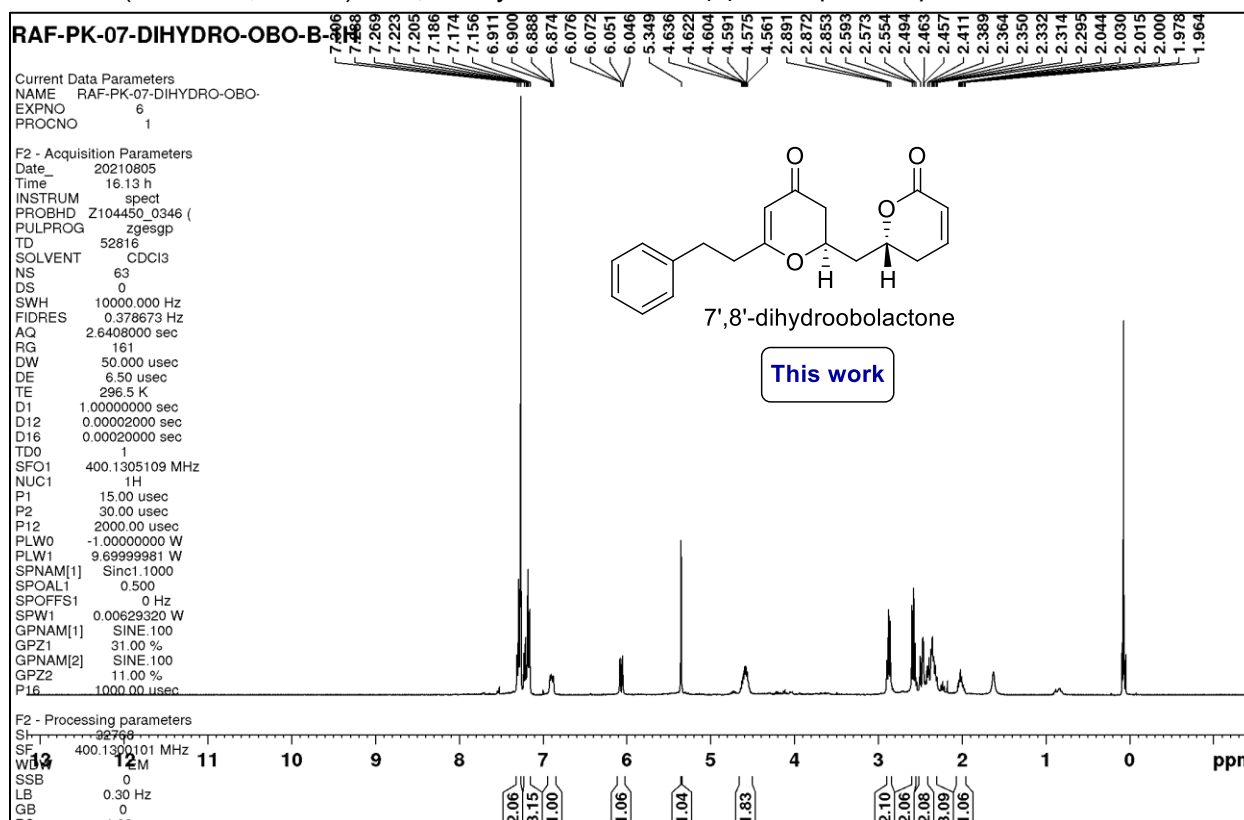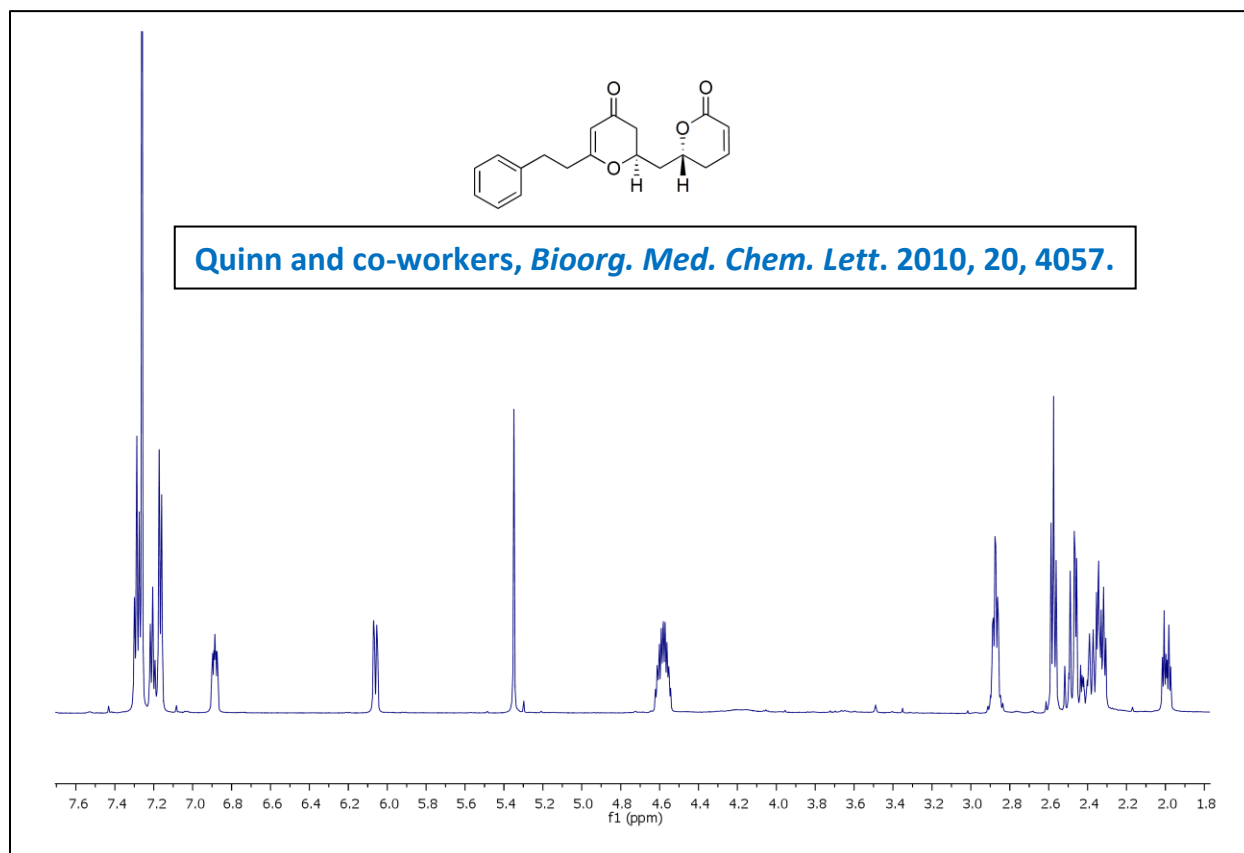

$^{13}\text{C}\{^1\text{H}\}$  NMR (100 MHz,  $\text{CDCl}_3$ ) of 7',8'-dihydrobolactone (**2**) and reported spectra

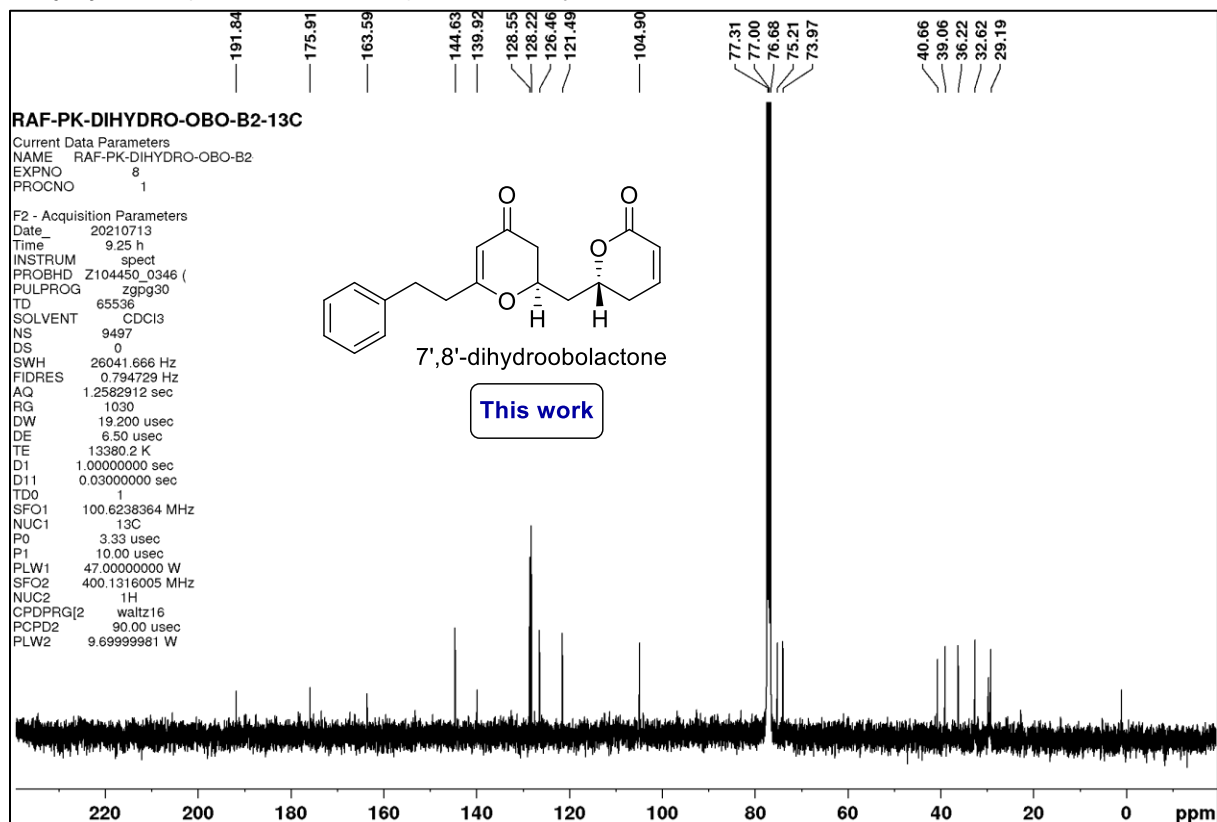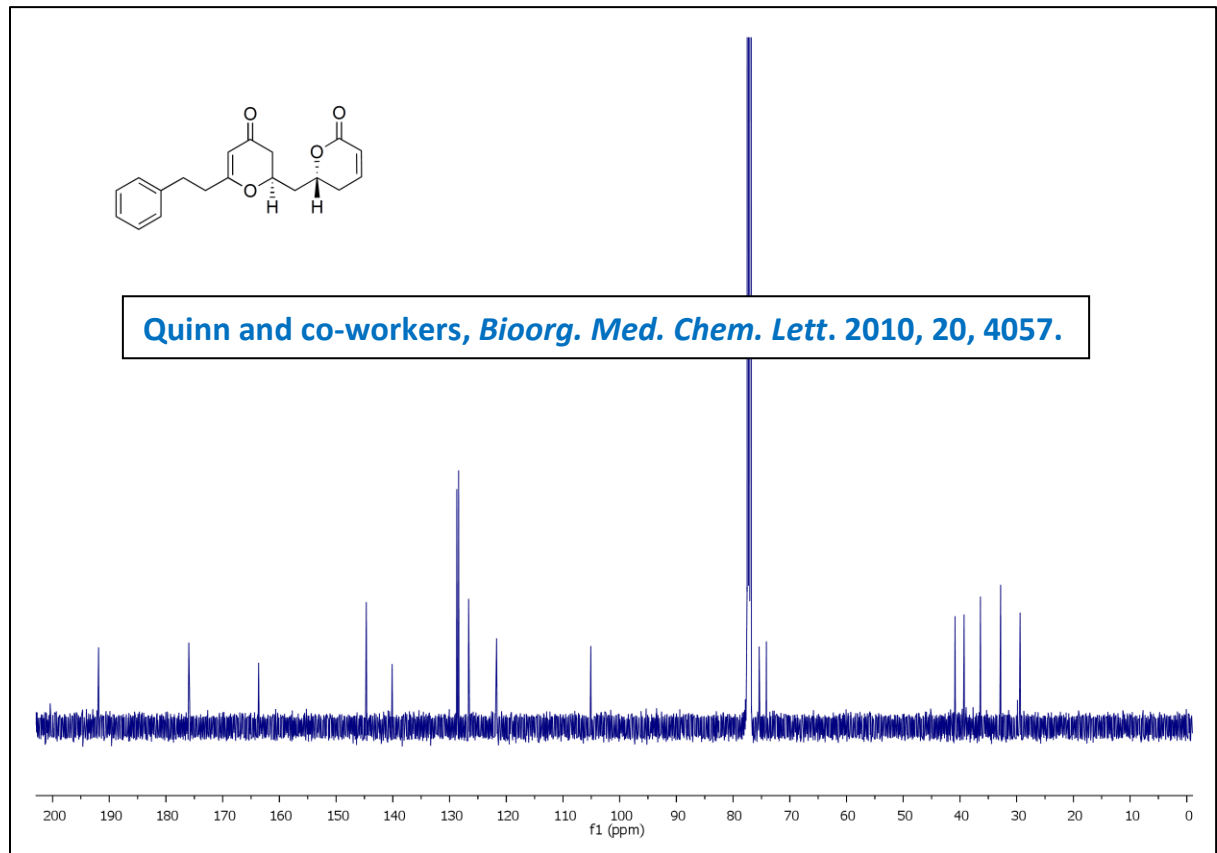

<sup>1</sup>H NMR (400 MHz, CDCl<sub>3</sub>) and <sup>13</sup>C{<sup>1</sup>H} NMR (100 MHz, CDCl<sub>3</sub>) of 6-*epi*-7',8'-dihydroobolactone (**2'**)

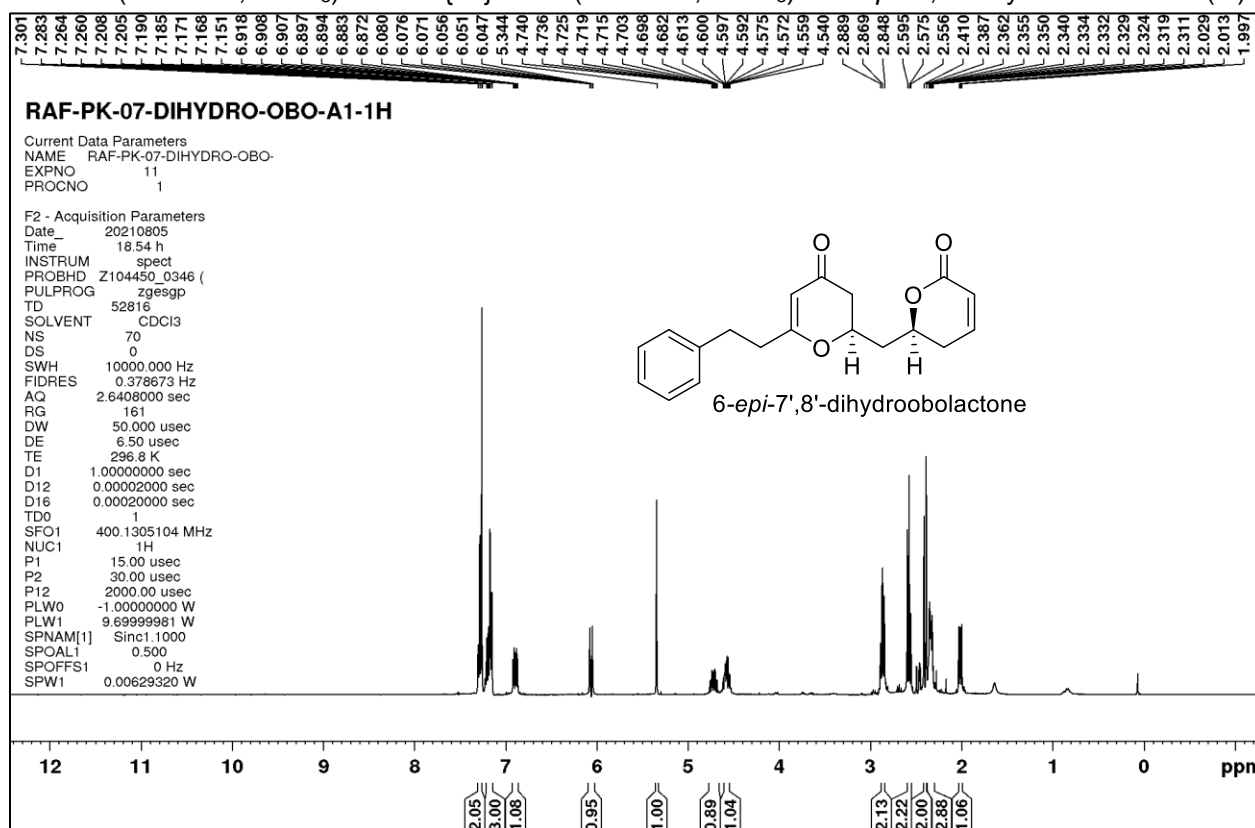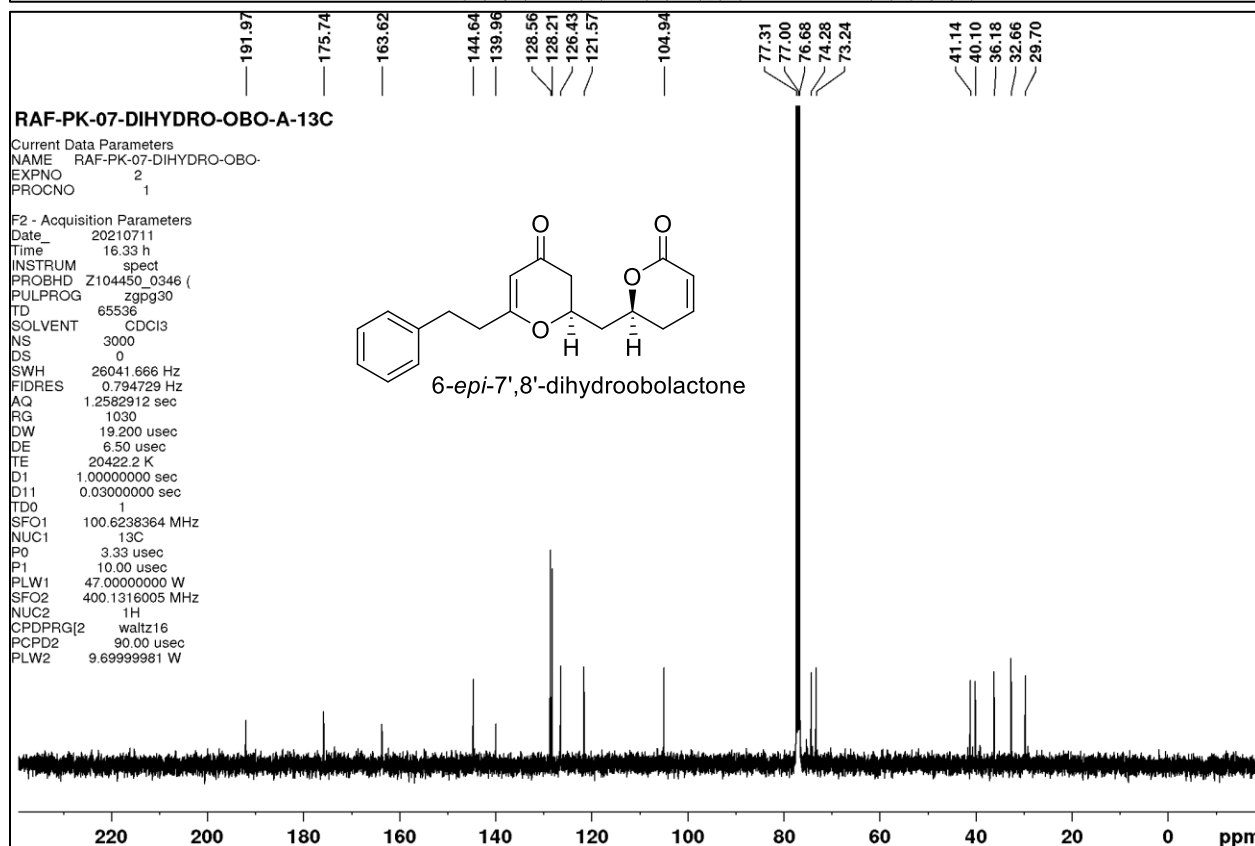

Supplement: d1nj03990c1.pdf [file d1nj03990c1.pdf]
